# Supplementary material for: Chemical unclonable functions based on operable random DNA pools
Source: PubMed Central journal article supplement (PMC10997750; doi:10.1038/s41467-024-47187-7), 2024-04-05
Supplement: 41467_2024_47187_MOESM1_ESM.pdf [file 41467_2024_47187_MOESM1_ESM.pdf]

1

2

3

4

5

6

7

**SUPPLEMENTARY INFORMATION TO THE MANUSCRIPT**

8

**CHEMICAL UNCLONABLE FUNCTIONS BASED ON OPERABLE RANDOM DNA POOLS**

9

10 Anne M. Luescher<sup>1</sup>, Andreas L. Gimpel<sup>1</sup>, Wendelin J. Stark<sup>1</sup>, Reinhard Heckel<sup>2</sup> und Robert N. Grass<sup>1\*</sup>

11 <sup>1</sup> Department of Chemistry and Applied Biosciences, ETH Zürich, Vladimir-Prelog-Weg 1-5, 8093,  
12 Zürich, Switzerland

13 <sup>2</sup> Department of Computer Engineering, Technical University of Munich, Arcistrasse 21, 80333,  
14 Munich, Germany

15 \*Corresponding author, robert.grass@chem.ethz.ch

16

17 **Supplementary Information**

18 Supplementary Figures 1-17

19 Supplementary Notes 1-13

20 Supplementary Tables 1-5

21

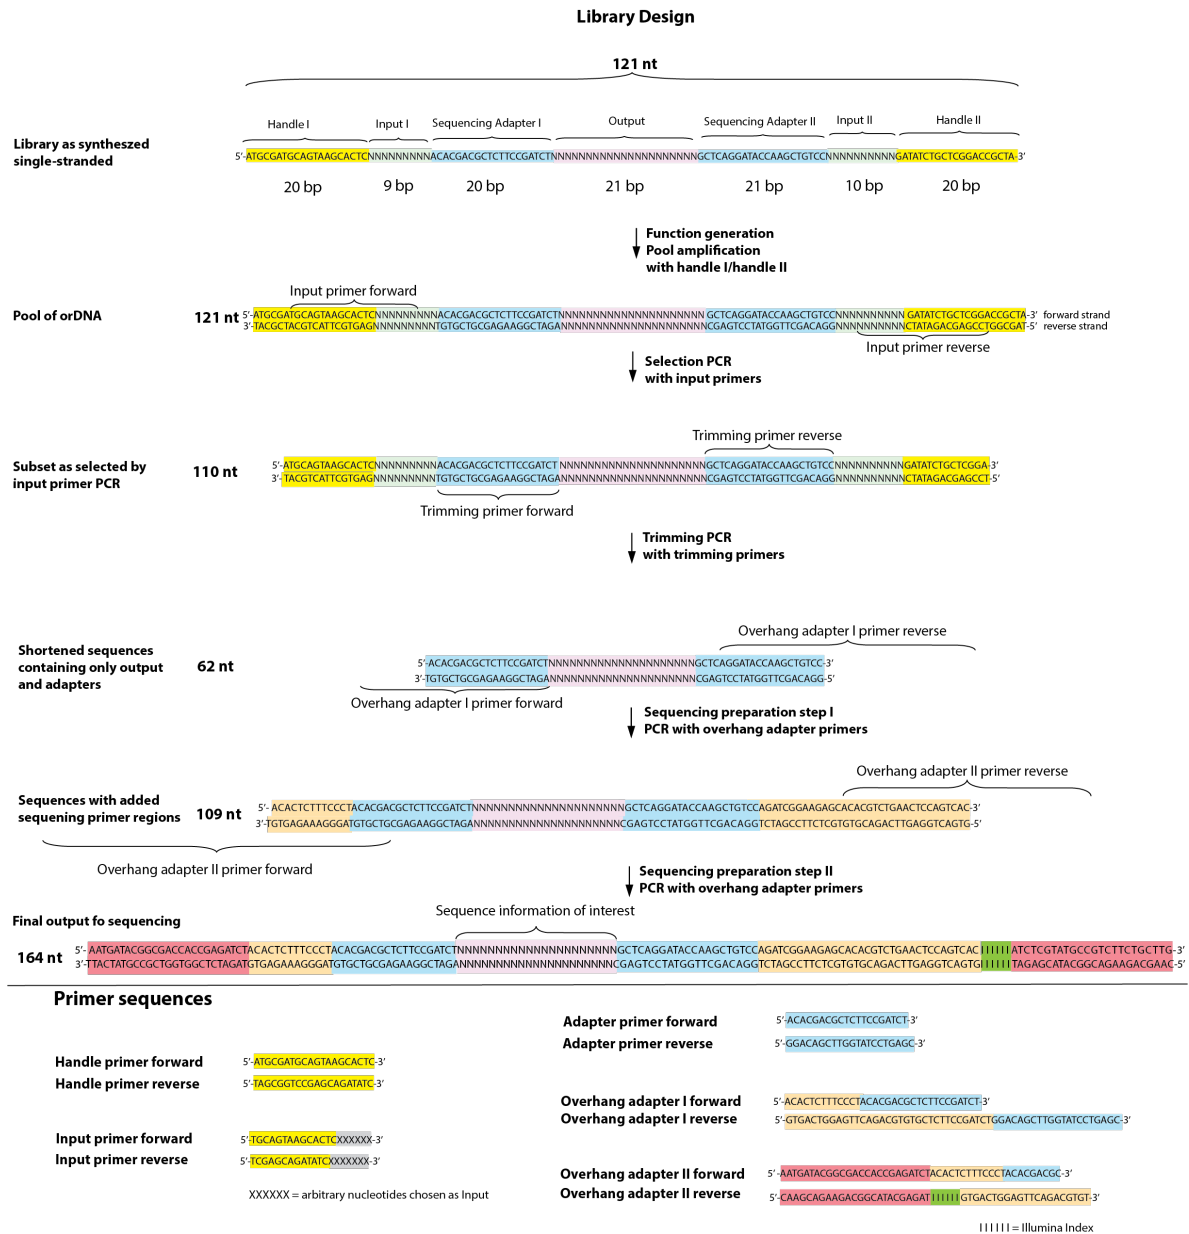

22

23 **Supplementary Fig. 1: Library design**

24 Shown are the sequence structures at various stages of the process of creating and operating the  
 25 chemical function. First, a pool comprising several milligrams of single-stranded  
 26 oligonucleotides is obtained from solid-state synthesis, comprising both sequence-determined and  
 27 random segments. A subset of this library (e.g.  $10^8 - 10^{11}$  sequences) is then amplified via PCR using  
 28 the outer handles as primers. The orDNA pool can then be operated using a set of input primers. The  
 29 two inputs comprise a few bases (number may vary between 6 and 9), which selectively bind to the  
 30 sequences in the pool with complementary matching segments in their randomly synthesized regions.  
 31 Aside from the bases binding to the input regions, the primer further contains a part of the handle  
 32 sequences to guide the input towards the correct binding position and to add enough length to the  
 2

33 primers for successful amplification. The selected sequences are only a very small subset of the  
34 orDNA pool and are identified via next generation sequencing. To prepare sequencing, three further  
35 PCR reactions are conducted. First, the sequences are trimmed using the two adapter primers. The  
36 vast majority of the resulting pool then only contains the two adapters with the output section in  
37 between. In two subsequent steps the Illumina sequencing overhang adapters are introduced, which  
38 then allow readout of the output. Representative gel images of the different stages can be found in  
39 Supplementary Fig. 4.

40

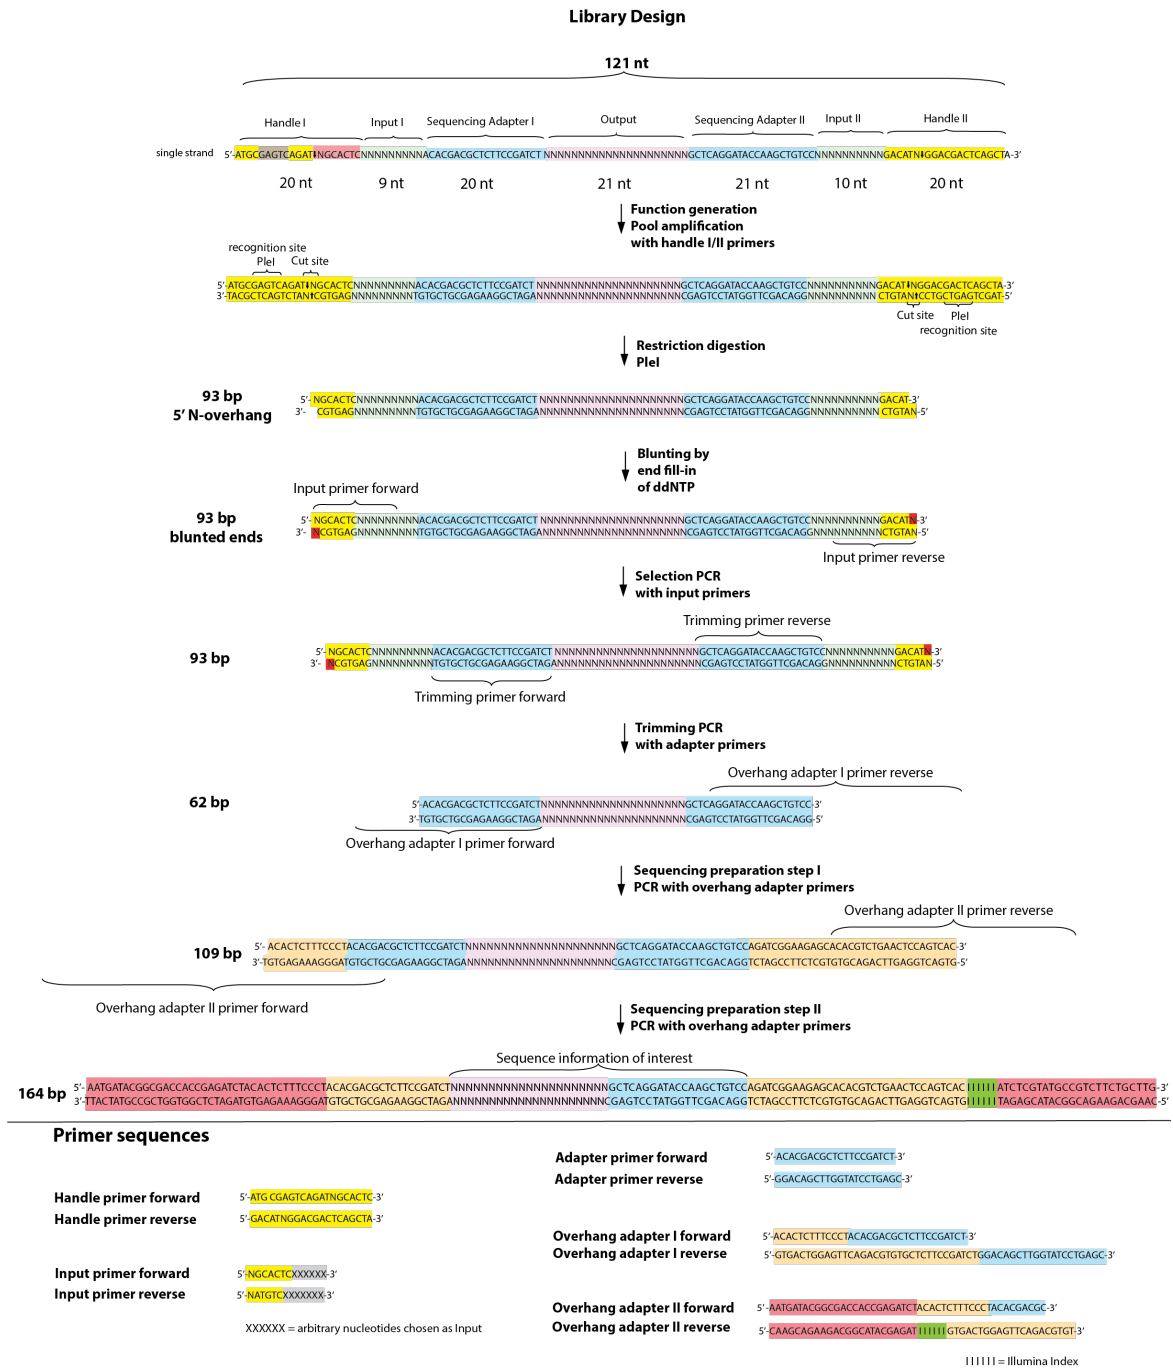

41

42 **Supplementary Fig. 2: Library design with cleavable handles.**

43 Shown are the sequence structures at various stages of the process of creating and operating the  
 44 chemical random function. The working principle is identical as described for the library described in  
 45 Supplementary Fig. 1, but there are additional steps to make the orDNA not only operable, but  
 46 unclonable. The double-stranded (ds) PCR pool is treated with a type IIS restriction enzyme, PstI, that  
 47 removes a large part of the handle and leaves a 5' overhang of a degenerate nucleotide. The sticky

48 end is blunted using Sequenase, which incorporates the complementary nucleotide with a dideoxy  
49 modification.

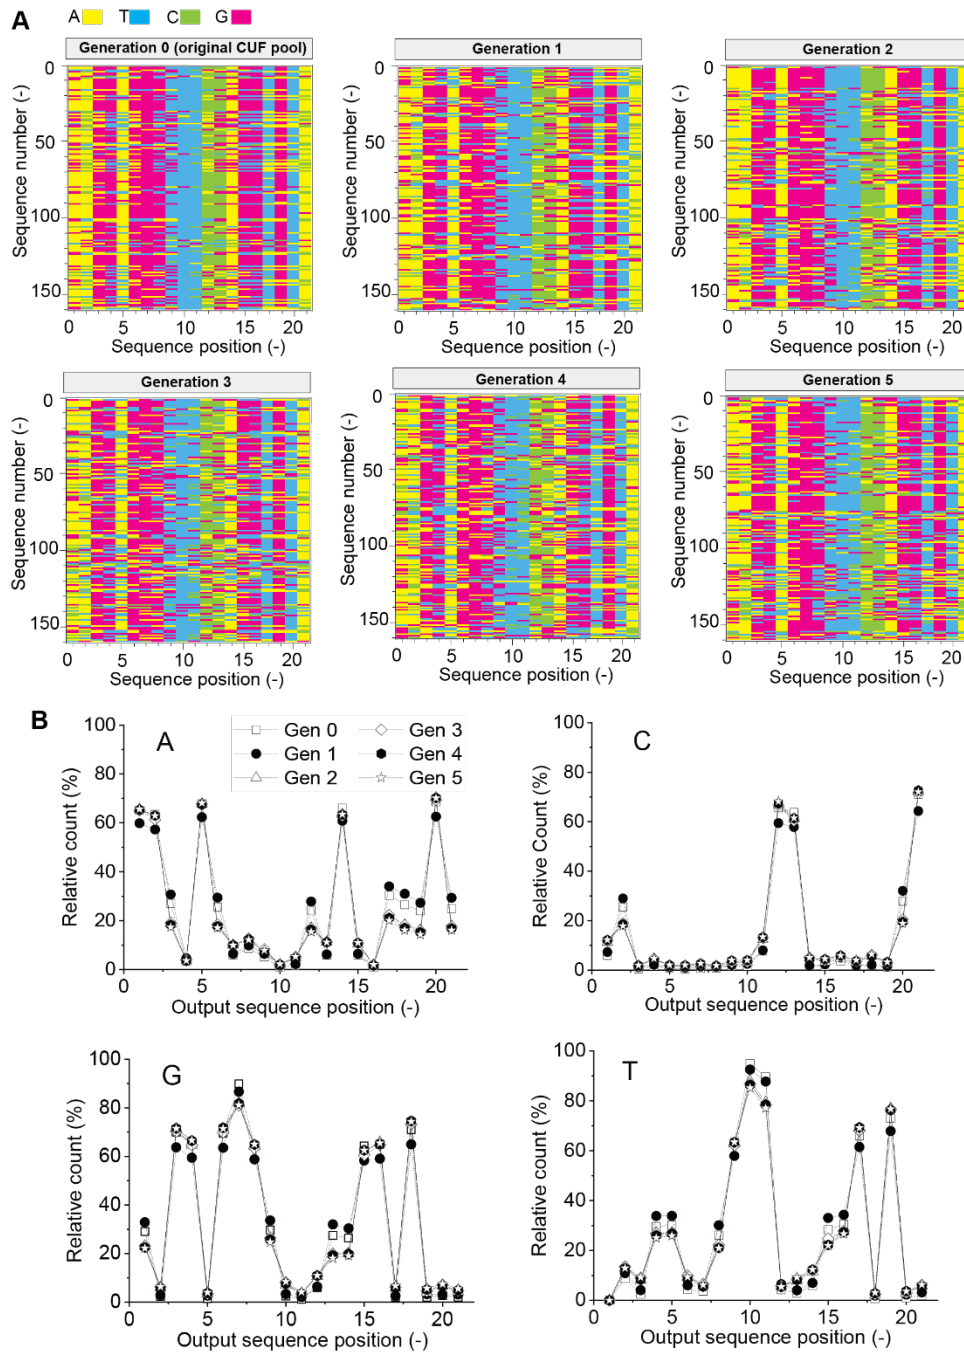

50

51 **Supplementary Fig. 3: Raw data analysis of proliferation CRPs**

52 Position-dependent raw data analysis of experiments 1 and 6-10, comprising the Illumina sequence  
 53 reads resulting from the same input applied to five generations of the same CUF, i.e. the same orDNA  
 54 pool, showing a high qualitative similarity between all generations (also refer to Fig. 3 (b), (c)). Each  
 55 generation was created by copying the previous generation using PCR. A) Color-coded visualization of  
 56 the occurrence of the four nucleobases A, C, G and T across the 21 positions of the output  
 57 sequences. Shown are the first 160 reads out of the respective FASTQ file after filtering for the

58 presence of the constant adapter regions. The selection is thus arbitrary without any applied order. B)  
59 Relative frequency of the four nucleobases A, C, G and T across the 21 positions of the output across  
60 the entire sequence set resulting from Illumina sequencing. Source data are provided as a Source  
61 Data file.

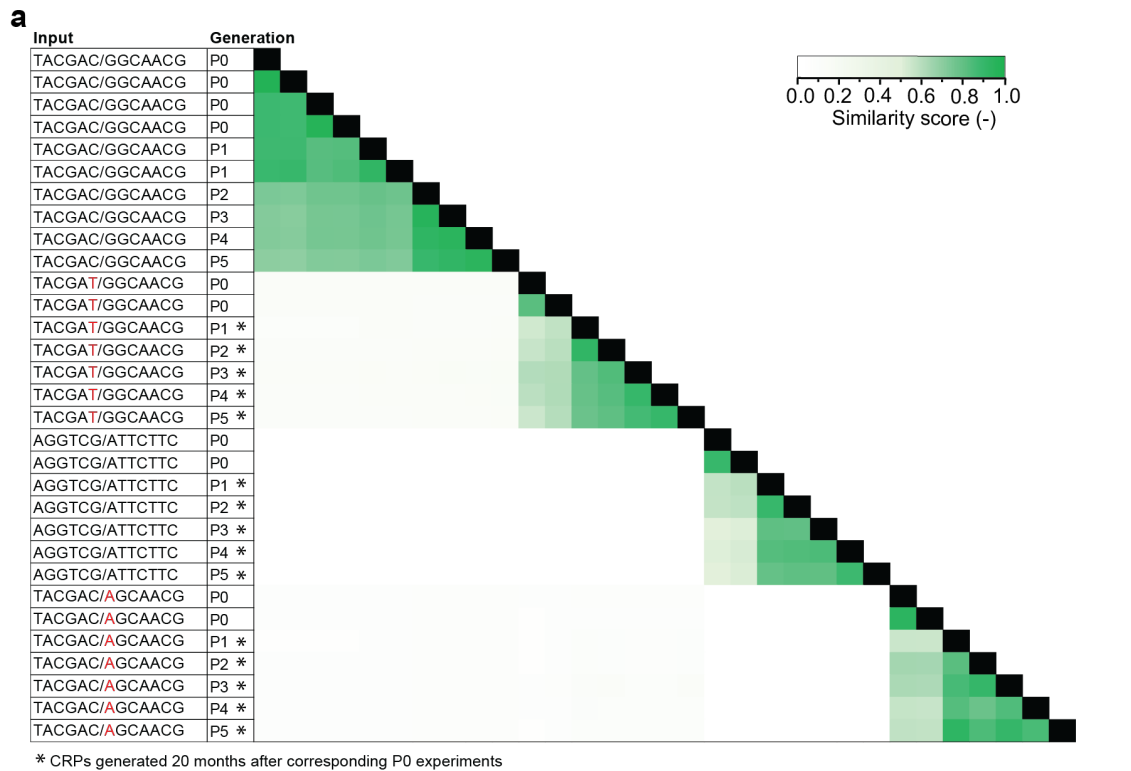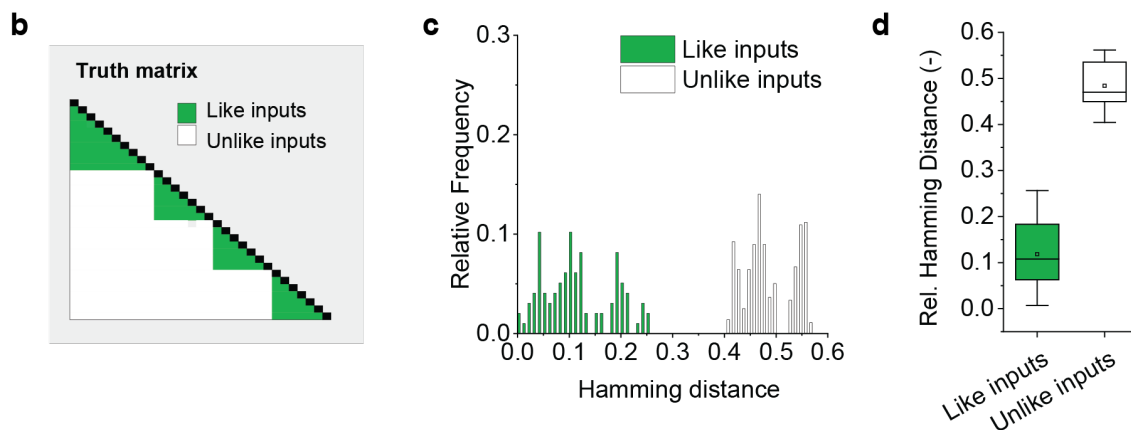

62

63 **Supplementary Fig. 4**

64 Extended data for generations P0-P5 (experiments 40-54, refer to Supplementary Tables 4-5), using  
 65 four different inputs. Inputs 2-4 with generations P1-P5 were measured 20 months after the CRPs  
 66 generated with P0. **a** shows the Jaccard similarity of CRPs comparing P0-P5 outputs. Jaccard  
 67 similarity across generations as well as the 20-month time gap among like inputs is still well above  
 68 Jaccard similarity of any CRP generated with unlike inputs, including the ones differing by a  
 69 Levenshtein distance of 1. **b** Corresponding truth matrix to (a). **c** Histograms of Hamming distances  
 70 after MinHashing showing the distributions of like and unlike inputs for experiments as shown in (a). n  
 71 = 357 comparisons for unlike distribution, n = 98 for like distribution. **d** Boxplot showing average



72 relative Hamming distances, as per the distributions in (c). Indicated are the median (middle line),  
73 mean (circled dot), 25<sup>th</sup> and 75<sup>th</sup> percentile (box) and 1.5 interquartile range (whiskers), with outliers  
74 marked as black dots. n = 357 comparisons for unlike distribution, n = 98 for like distribution. Source  
75 data are provided as a Source Data file.

76

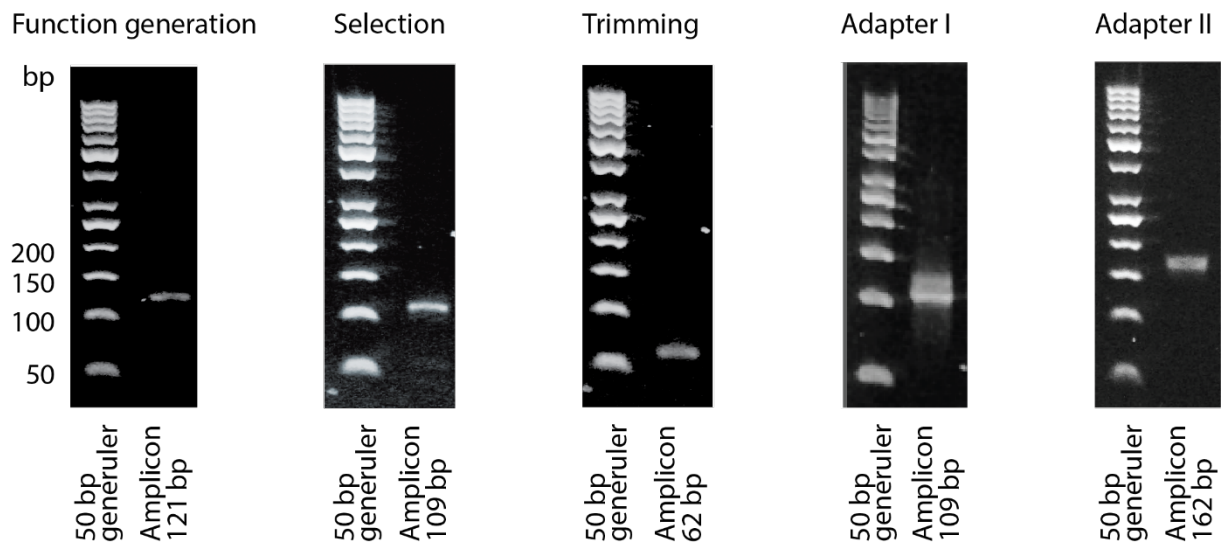

78

79 **Supplementary Fig. 5**

80 Agarose gel electrophoresis photographs of the different steps of function generation and operation,  
 81 showing all stages of experiment 1. Images were converted from color to greyscale and edited in  
 82 brightness and contrast using Adobe Photoshop.

83 **Supplementary Note 1: Random DNA synthesis**

84 Solid-support synthesis of DNA is commercially widely available. In standard chemical synthesis of  
85 DNA, the strands are grown nucleotide by nucleotide in an iterative reaction, where each cycle  
86 consists of several steps and adds a single base to each growing chain (Fig. 5). For most use cases,  
87 this is done in a controlled manner, meaning only one type of building block (dNTP) at a time is added  
88 to achieve billions of identical strands of constant length and known sequence. However, it is possible  
89 to instead add mixtures of the four nucleobases A, C, G and T. In this case each growing chain will  
90 incorporate only one of the four possible building blocks. It has been shown that this process is  
91 random<sup>1</sup>, meaning the entropy of a mixture can be exploited in a chemical reaction resulting in DNA  
92 molecules of random sequence. Each sequence can thus be understood as a random (binary)  
93 number, where every base contributes two bits. As the synthesis is stepwise, it can be individually  
94 decided for each position along a synthesized sequence whether that specific position will contain a  
95 determined or a randomly incorporated building block.

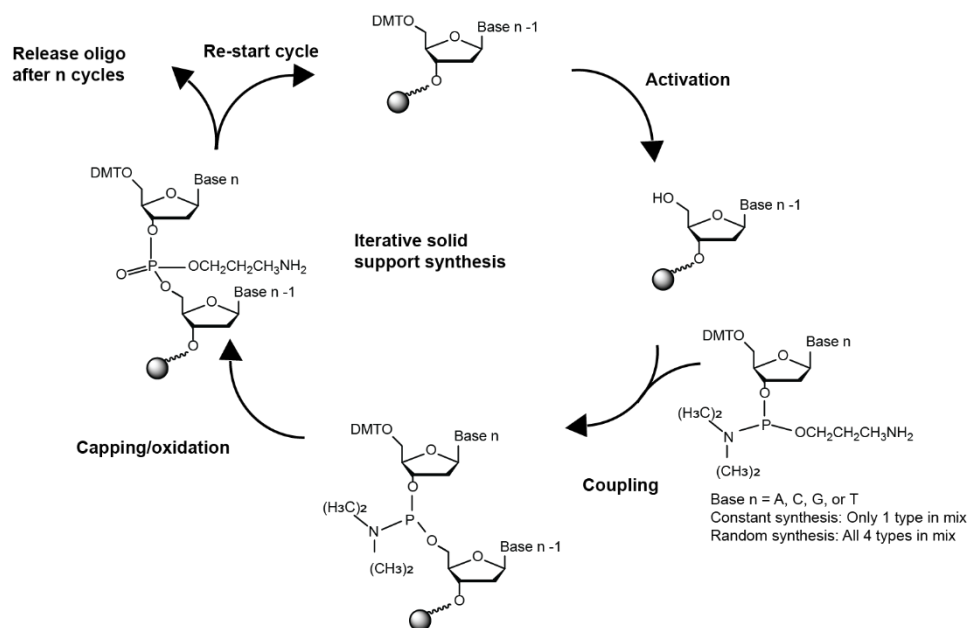

96

97 **Supplementary Fig. 6: Schematic representation of chemical DNA synthesis.**

98 The cyclic process adding a single nucleotide to each growing chain consists of an activation step,  
99 followed by coupling, capping/oxidation. The cycle is followed until the desired chain length is  
100 achieved, after which the synthesized oligonucleotide is released from the solid support. In the case of  
101 sequence-determined synthesis, only a single type of nucleotide is added during the coupling step,

102 while for random synthesis, all four building blocks are mixed previous to addition, with each growing  
103 chain incorporating only one of the four.

104

105 **Supplementary Note 2: Unpredictability and unknowability of sequence composition**

106 As in chemical unclonable functions each DNA strand contains segments that are randomly  
107 synthesized, given the stochasticity of the process, it is a priori impossible to know the composition of  
108 any given strand. For a chemical unclonable function based on operable random DNA this  
109 unpredictability is key, as it translates to a random combination of input and output sequences.  
110 Therefore, a given output sequence does not confer any information about the base composition of  
111 the input and vice versa (see also Supplementary Note 3).

112

113 **Supplementary Note 3: Expected distribution of sequences within random pools and pool**  
114 **entropy**

115 There are  $4^n$  possible sequences for a randomly synthesized batch of DNA, where  $n$  corresponds to  
116 the number of synthetic cycles using a dNTP mixture. The cycles using a single dNTP type, i.e. the  
117 cycles for synthesis of the sequence-determined parts, are not included in the calculation, as they do  
118 not contribute to the possibility space (aside from a negligible contribution by errors). As in this work,  
119 libraries with a total of 40 random positions in the input and output segments were implemented, there  
120 are  $4^{40} = \text{ca } 10^{24}$  possible sequences, corresponding to approx. 1.66 mol of DNA. With an average of  
121 330 g/mol/base · 121 bases (random and constant combined) this corresponds to a molecular weight of  
122 ca. 40'000 g/mol for the single-stranded synthesis product of our library. This means to synthesize  
123 every possible combination on average at least once, ca. 40'000 g/mol · 1.66 mol = 66 kg of DNA would  
124 have to be produced. Around 4 mg of DNA were synthesized in total, equivalent to ca.  $6 \cdot 10^{16}$   
125 sequences. Importantly, the synthesis process only comprises individually growing chains without  
126 copies (the sequences are only copied post-synthetically in a PCR reaction). This means any  
127 duplicates only exist by chance and not by design. The probability for a specified pair of two individual  
128 sequences being the same equals to  $0.25^{40} = 8.27 \cdot 10^{-25}$ .

129 From the synthesized pool,  $10^8$  sequences,  $1.6 \cdot 10^9$  and  $2.6 \cdot 10^{10}$  sequences were arbitrarily extracted  
130 to generate the three CUF sizes (with prefixes S, M and L). The extraction was performed by  
131 dissolving the dried pool in ultrapure water to a known concentration. Using dilution series, it is then  
132 possible to draw a volume that approximately corresponds to the number of desired sequences, which  
133 are then subjected to PCR for function generation. With this ratio of function-determining vs. possible  
134 combinations, the vast majority of the sequences is expected to be unique, with the overall average  
135 copy number being very close to one.

136 As there are four possible building blocks per randomly synthesized sequence position, two bits of  
137 entropy are encoded in a single base (translating to assigning binary numbers 00, 01, 10, 11 to the  
138 four bases). As there are 40 random bases per sequence, this corresponds to 80 bits of random  
139 information. As established above, ca 4 mg ( $6 \cdot 10^{16}$  sequences or 100 nmol) of an orDNA library were  
140 synthesized by a commercial supplier. This results in a total entropy of 80 bits/sequence  $\times 6 \cdot 10^{16}$   
141 sequences =  $5 \cdot 10^{18}$  bits = 0.5 Exabyte (rounded to the first decimal position) in the pool.

#### 142 **Supplementary Note 4: Design considerations for input primers**

143 Not all conceivable PCR primers are suitable input primers. Most importantly, the ratio between the  
144 function size (= number of unique DNA sequences in a selection PCR, e.g.  $10^8$ ) and the chosen input  
145 length in base pairs is relevant: If the input is too long, a given primer may not find any complementary  
146 sequence in the pool to bind to, leading to an unspecific signal, or no amplification at all. If it is too  
147 short, too many sequences may be amplified for successful signal extraction. This relationship is  
148 shown in Fig. 6, which plots the expected number of output sequences against the input length for  
149 three different pool sizes. For the pilot experiments, the input length was selected such that the  
150 expected number of sequences that perfectly match to a given input primer sequence in the pool is  
151 approx. 1.5. The actual number of matches varies between experiments and is expected to be  
152 Poisson-distributed. For a pool of  $10^8$  sequences, the input length corresponding to this value is 13  
153 random bases in total ( $4^{13} = 6.7 \cdot 10^7$ ). The input was distributed over the forward and reverse primers  
154 with 6 and 7 input bases, respectively. For the primers to reach high enough melting temperatures, 14  
155 additional nucleotides were added, which were chosen to overlap with the respective outer handle  
156 sequences (see Supplementary Fig. 1). This partial overlap with the constant regions of the orDNA is  
157 additionally desirable, as this encourages binding at the intended positions, i.e. the random input  
158 segments and not the random output segment. This results in amplicons of constant length and  
159 ensures the amplified sequences contain the output segment, which is the chemical readout of the  
160 function necessary to calculate a valid output.

161 However, inputs with a higher number of selective nucleotides have been shown to still generate  
162 reproducible outputs in the test setting, even though no perfect counterpart is expected to be present  
163 in the pool. This can be explained by the fact that there are always primer-template hybrids that are  
164 thermodynamically more favored than others, and the corresponding sequences are thus favorably  
165 amplified, even if the match is imperfect. As the readout of the function is generated by the entirety of  
166 the amplified sequences and their frequency of occurrence, this distribution still works as a  
167 reproducible signature. However, with an increased input length, a lower proportion of the nucleotides  
168 is expected to contribute to the specificity of the readout and the noise increases, potentially leading to  
169 the occurrence of collisions with shorter inputs. Therefore, depending on the application scenario, it is  
170 advantageous to restrict the input length to conform to the respective pool size (see also  
171 Supplementary Note 8.

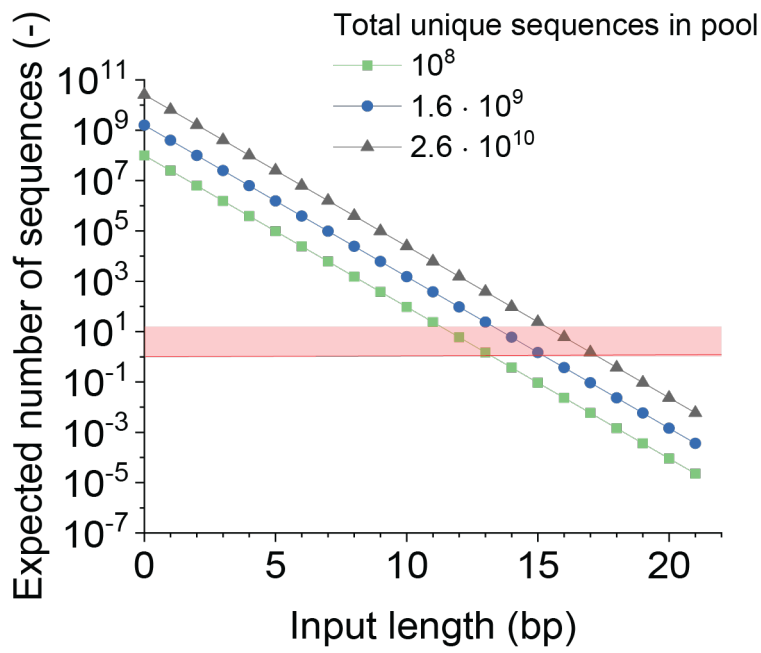

172

173 **Supplementary Fig. 7**

174 Relationship of the expected number of matching output sequences in a pool related to the input  
 175 length in basepairs (bp) at different orDNA pool diversities. The red area approximately marks the  
 176 range this work operated in. Source data are provided as a Source Data file.

177



178 **Supplementary Note 5: Filtering of the sequencing reads**

179 Before applying k-mer extraction and computation of similarity, the reads were filtered to remove any  
180 artefacts and potential contaminations. All correctly amplified orDNA sequences are expected to have  
181 the same overall arrangement of their constant and random regions. Therefore, using the BBmap  
182 (v38.99) command below, the reads were filtered for the presence of the constant primer region,  
183 allowing a maximum Hamming distance of 3. Of the reads passing the first filter, those were excluded  
184 that did not contain a 21-bp long insert between the expected constant segments. Only these inserts  
185 of the passing reads, comprising the randomly synthesized 'output' portions, were included for further  
186 analysis.

```
187 bbduk.sh in=<input.fq.gz> outm=stdout.fq ref=primer.fasta k=21 hdist=3 | bbduk.sh in=stdin.fq  
188 out=<output.fq.gz> ref=primer.fasta ktrim=r interleaved=f k=21 hdist=3 maxlength=21 mininsert=21  
189 minlength=21
```

190

191

192 **Supplementary Note 6: Choice of k-mer extraction and Jaccard similarity as data processing**  
193 **methods**

194 In contrast to mathematical operations, data collected from real-world experiments are noisy. For the  
195 assessment of chemical unclonable functions, this is an issue, as two individual operations of the  
196 function will almost never lead to the exact same result, even if the equivalent inputs were used.  
197 Physical unclonable functions and biometric data processing, e.g. human fingerprint analysis, face the  
198 same issue. As a consequence, such datasets are analyzed in terms of their similarity instead of  
199 perfect identity, with a defined similarity threshold above which the noisy datasets are considered  
200 identical.

201 A k-mer-based method is suitable, as k-mers are commonly utilized in bioinformatics and, more  
202 specifically, applied for genome comparisons<sup>2</sup>. As the sequences of interest (the 'output' segments of  
203 the sequences amplified during PCR selection with the input primers) are only 21 nt long, a circular k-  
204 mer extraction was applied. This approach can be described by virtually circularizing the sequence of  
205 interest and forming k-mers around the circle, as explained in Supplementary Fig. . For a sequence of  
206 length  $n$  this leads to  $n$  k-mers independently of  $k$ , while linear extraction only yields  $n-k+1$  k-mers.  
207 Circular analysis therefore puts equal weight on all sequence positions, while a linear analysis would  
208 over-emphasize the center nucleotides relative to the edges.

209 Further, to compare the k-mer sets extracted from the sequencing data, Jaccard similarity was used.  
210 This index is widely used in machine learning, computational genomics and other fields<sup>3</sup>. It is  
211 calculated by the ratio between the size of the intersection of two sets  $A$  and  $B$  divided by their union:

$$212 \quad J(A, B) = \frac{|A \cap B|}{|A \cup B|}$$

213 Furthermore, the Jaccard coefficient can be weighted:

$$214 \quad J(A, B) = \frac{\sum_k \min(A_k, B_k)}{\sum_k \max(A_k, B_k)}$$

215 While the unweighted coefficient only considers the presence or absence of a given k-mer, the  
216 weighted coefficient considers the frequency of occurrence and thus the contribution of each k-mer to  
217 the overall 'fingerprint'. Applying a weighted coefficient is therefore more comprehensive.

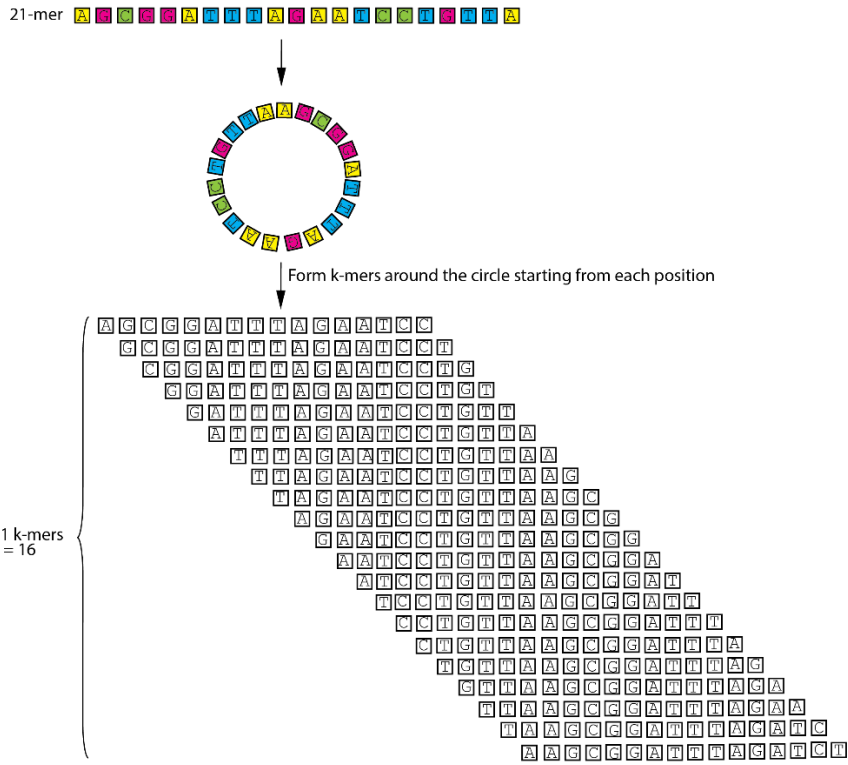

218

219 **Supplementary Fig. 8: k-mer analysis**

220 Schematic sketch of extracting all 21 possible 16-mers from a 21-mer in a circular k-mer extraction

221 procedure.

222 **Supplementary Note 7: Parameter choice and robustness**

223 The chosen methods of k-mer extraction and Jaccard similarity comprise several parameters that have  
224 to be selected before data processing. Namely,  $k$  has to be selected, and optionally a weighting  
225 regimen for the Jaccard coefficient as well as the choice of how many reads to include in the analysis.  
226 The latter is designed to exclude the reads with the lowest counts from the analysis and is expressed  
227 as a percentage threshold. I.e. a threshold of 0.7 only includes the reads that cumulatively make up  
228 70% of the read count (starting with the highest frequency), and vice versa excludes the 30% lowest-  
229 frequency reads. This is an additional measure to remove artefacts and noise while still utilizing the  
230 relevant information.

231 These parameters influence the performance of the algorithm in correctly categorizing the compared  
232 sets as belonging to like, or unlike inputs. In order to find well-performing parameters, they were  
233 screened by combinatorically applying them to the collected original dataset of 39 individual  
234 experiments (refer to Fig. 3(a), (c), and (d)). The screened values were  $k = [4, 6, 8, 10, 12]$ , weighting  
235 = [none, linear, logarithmic] and read frequency threshold = [0.5, 0.7, 0.9]. The optimized metric was  
236 the relative distance  $d$  of the Jaccard similarity score between the most similar sets resulting from  
237 different inputs and the most dissimilar sets resulting from the same input. The parameters achieving  
238 the highest distance between the two distributions (same and different inputs) were  $k = 8$ , linear  
239 weighting and a read frequency threshold of 0.7 (70%). The separation between the like and unlike  
240 input distributions is  $d = 0.256$  when applying the selected parameters. The separation only slightly to  
241 moderately decreases when changing the values of  $k$  and the threshold (Fig. 8a, b). However, the  
242 separation is not maintained when switching the weighting regime (Fig. 8c). Reducing (by logarithm) or  
243 removing the weighting does not significantly affect the similarity of unlike inputs but leads to a  
244 broadening of the like input similarity distribution. This highlights that the read frequency information is  
245 highly relevant for response generation, and that the differentiation of similar inputs is significantly  
246 derived from changing frequencies rather than the mere presence of different k-mers.

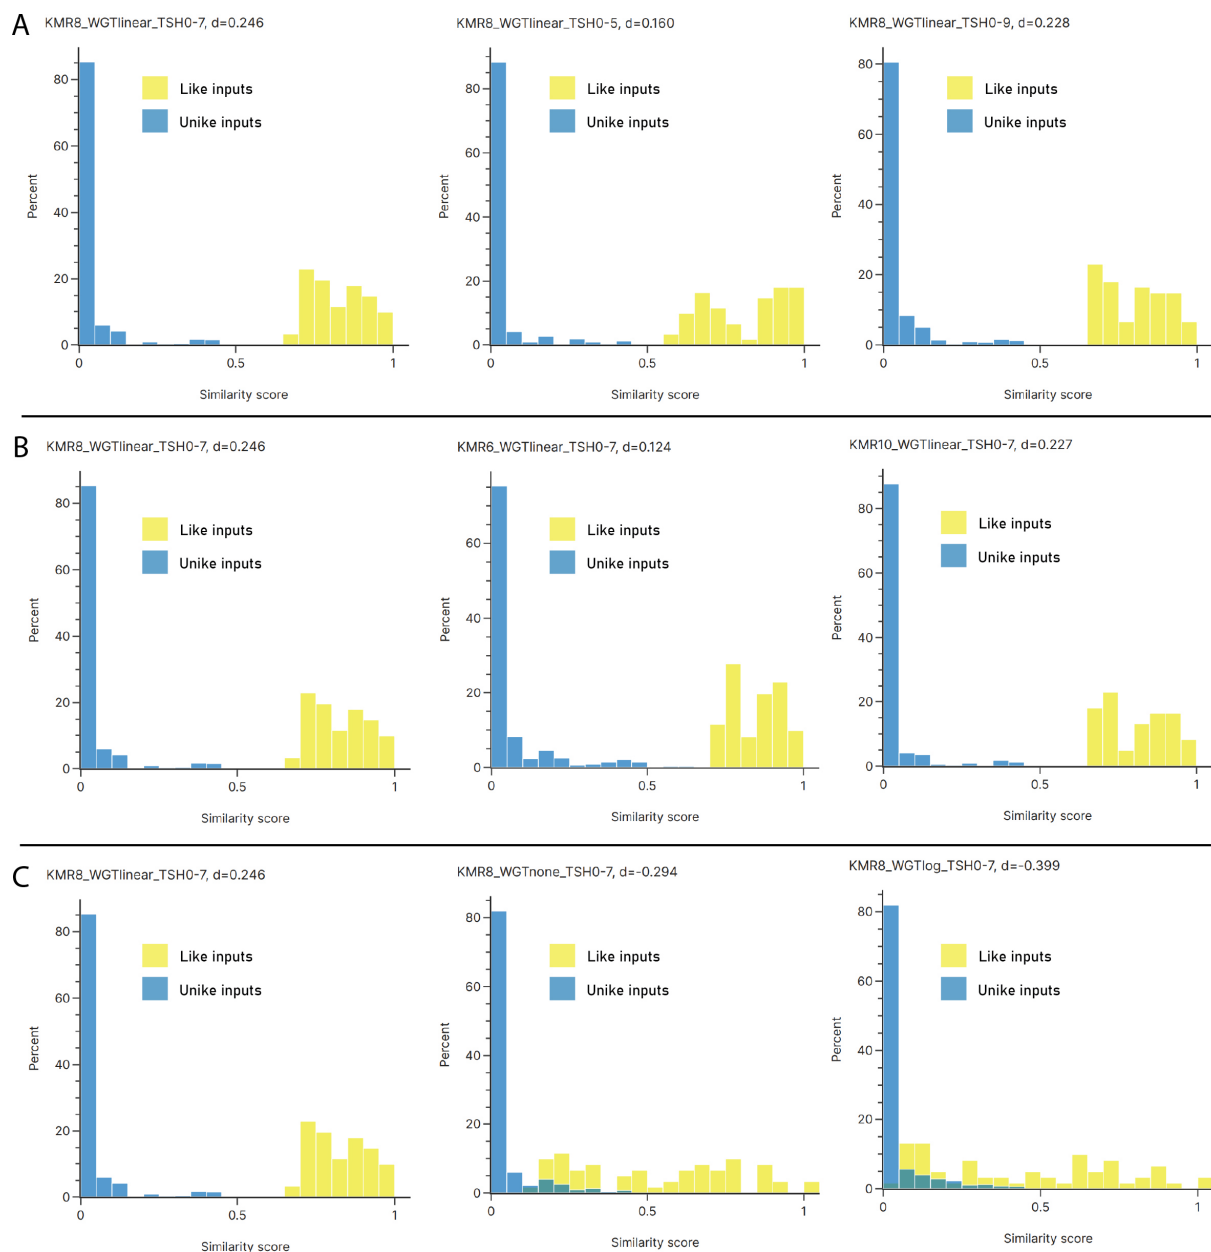

247

248 **Supplementary Fig. 9: Parameter robustness**

249 Histograms of similarity scores of all like (yellow distribution) and unlike (blue distribution) inputs  
 250 across experiments 1-39 when using different parameters for k-mer extraction and similarity  
 251 computation. The parameters and resulting distance  $d$  between the two distributions are indicated for  
 252 each histogram, KMR referring to the value of  $k$ , WGT to the weighting applied (linear, logarithmic or  
 253 none) and TSH to the relative read frequency threshold. A) Histograms showing the effect of varying  
 254 the read frequency cut at  $k=8$  with linear weighting. B) Histograms showing the effect of varying  $k$   
 255 while keeping the other parameters constant at TSH=0.7 and WGT=linear. C) Histograms showing the

256 effect of varying the weighting at constant  $k=8$  and  $TSH=0.7$ . Source data are provided as a Source  
257 Data file.

### 258 **Supplementary Note 8: Discussion of the parameters and input constraints**

259 It can be argued that a dataset comprising 39 experiments is not comprehensive and, therefore, that  
260 the parameters emerging from the optimization are arbitrary. While this is a valid concern, the dataset  
261 on which the parameters were optimized is heavily biased towards sets that are difficult to  
262 differentiate. Many of the cross-compared inputs have a minimal Levenshtein distance of 1. Among  
263 them were input primers that only differ in their length by a single nucleotide but were otherwise  
264 identical, which are expected to draw a highly similar sequence set from the pool in the selection PCR.  
265 The chosen parameters perform well in distinguishing these edge cases, showing an error rate of  
266 zero. Moreover, they separate the like from the unlike input distribution by a large margin (the minimal  
267 distance of Jaccard similarities being  $d=0.256$ , and the distance of the means  $d=0.797$ ). Therefore,  
268 these parameters can be expected to perform robustly over all potential inputs.

269 However, in a use case scenario, it may still be desirable to constrain the allowed inputs to a constant  
270 primer length and to limit their GC-content for practical reasons. For example, this would allow running  
271 all PCR reactions under the same conditions. When applying the length constraint in accordance with  
272 the pool size (as discussed in Supplementary Note 4), the inputs are limited to 13 nucleotides in total,  
273 distributed over the two primers. A common recommendation for optimal primer GC-content is  
274 approximately 40-60%. Considering that in the current design the input primers contain a constant  
275 portion with a fixed GC-content of 50%, the 13 nucleotides thus have to contain at least 3 and max. 10  
276 G/C nucleotides. When applying these constraints to the existing dataset, the poly-T and the variable-  
277 length inputs are excluded. The resulting distributions calculated with the previously selected  
278 parameters ( $k = 8$ , linear weighting and a read frequency threshold of 0.7) are shown in Fig. 9. The  
279 distance between the distributions approximately doubles from  $d=0.256$  for the case without  
280 constraints to  $d=0.542$  when the length requirement and limited GC content are implemented. Notably,  
281 this scenario still includes several inputs differing from each other by a Levenshtein distance of 1. This  
282 further highlights the robustness of the chosen method of data processing.

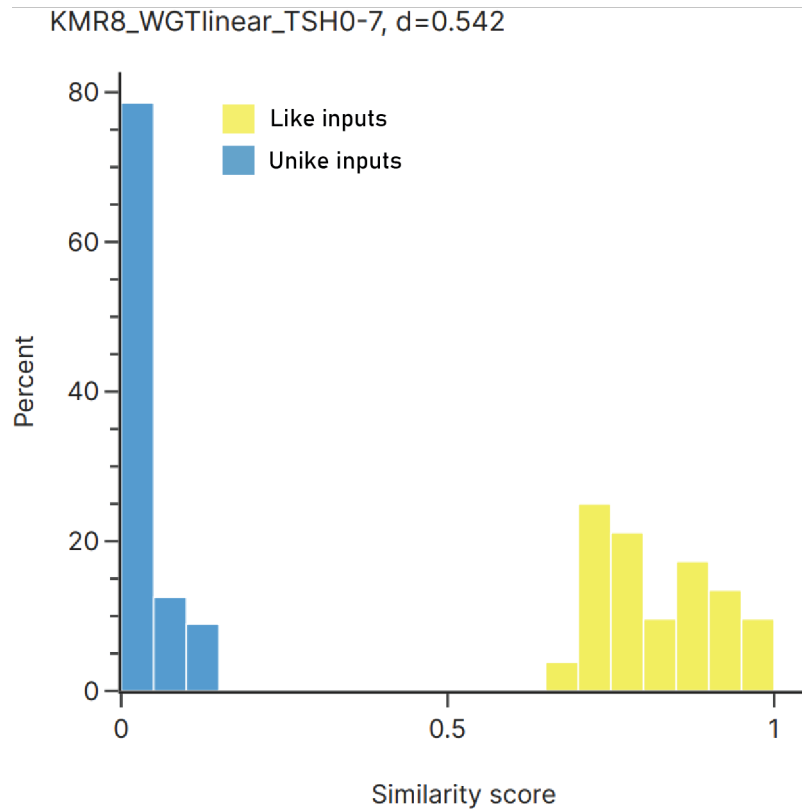

283

284 **Supplementary Fig. 10: Similarity scores with input constraints**

285 Histograms of similarity scores of all like (yellow distribution) and unlike (blue distribution) inputs  
 286 across 24 experiments when applying input constraints regarding length and GC-content of the  
 287 primers and using the parameters k=8, linear weighting and a read frequency threshold of 0.7. Source  
 288 data are provided as a Source Data file.

289

290 **Supplementary Note 9: Down-sampling simulation**

291 There are experimental factors that lead to varying read numbers and quality per experiment. To  
292 increase efficiency and extrapolate the limits of the system, down-sampling simulations were  
293 conducted to find the average minimum number of reads per execution of the CUF that still allows for  
294 correct output assignment with high fidelity. The simulation was performed with experiments 1-39  
295 using a python pipeline and comprised stochastically drawing sets of different sizes out of the actual  
296 number of reads using the python random number generator and performing feature extraction with  
297 the drawn sets. The number of simulations per set size was 30. For samples with less reads than the  
298 specified set size the entire read set was included in the analysis. The average distance of separation  
299 between similarity scores of like and unlike outputs was then investigated with respect to the drawn set  
300 size, the results of which are shown in Fig. 10. A distance of  $>0$  indicates that the similarity  
301 distributions of responses stemming from like and unlike inputs are entirely separable, meaning all  
302 outputs can be correctly assigned. In contrast, a negative distance implies that certain edge cases  
303 would be incorrectly assigned, i.e. two outputs stemming from the same input would be incorrectly  
304 assigned as belonging to a different input, or vice versa. From the draws, the probability for one or  
305 more response out of the generated dataset being incorrectly assigned was calculated with a one-  
306 sided t-test, assuming a normal distribution. The simulations showed that below 10'000 reads, the  
307 probability for a distance  $<0$  becomes practically relevant in the case where variable-length inputs are  
308 allowed. If length and GC-content constraints are applied (as discussed in Supplementary Note 9),  
309 down-sampling indicates that even a read set comprising 1000 sequences can be assigned with a  
310 success rate of close to 100%, even with the experiments including inputs with the minimal possible  
311 distance from each other. This has a positive impact on affordability, as the sequencing cost  
312 associated with 1000 reads is in the range of 10 cents.



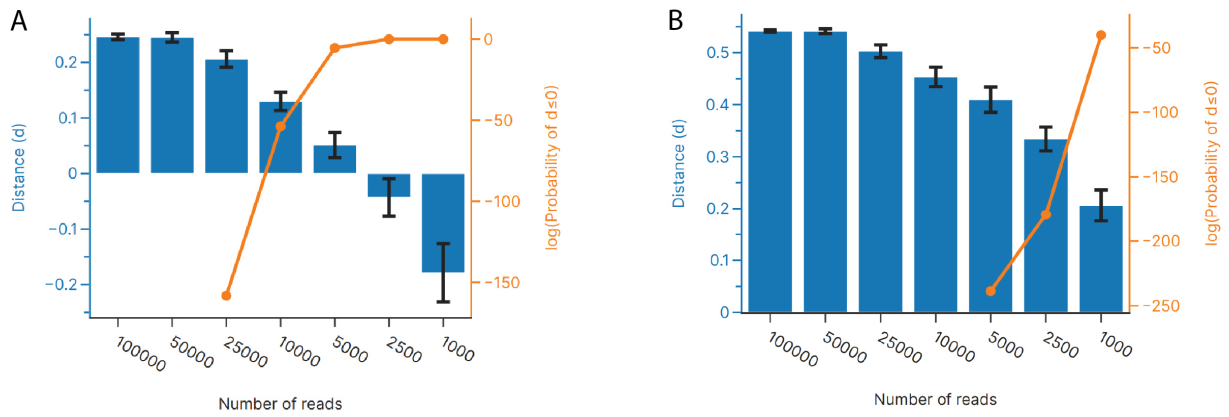

313

314 **Supplementary Fig. 11: Distance (d) after downsampling to the respective number of reads.**

315 The distance refers to the minimal difference in similarity score between the sets resulting from like  
 316 and unlike inputs after k-mer analysis using the entire dataset with parameters  $k=8$ ,  $\text{weight}=\text{linear}$ ,  
 317  $\text{threshold}=0.7$ . The number of draws per read was  $n=30$ . The error bars represent the 95% confidence  
 318 intervals for the distance resulting from all draws. The curve shows the probability that at a given  
 319 number of reads the resulting set distance using the indicated parameters will be  $\leq 0$ , whereby a  
 320 negative distance means that like and unlike inputs can no longer be completely distinguished. For  
 321 read numbers lacking a probability indicator the probability exceeded the float limit and thus shows as  
 322 zero, i.e. is not represented in the log chart. A) Distance d after downsampling to the respective  
 323 number of reads without applying input constraints. B) Distance d after downsampling to the  
 324 respective number of reads in the case where the input is constrained with respect to GC-content and  
 325 length. Source data are provided as a Source Data file.

## 326 **Supplementary Note 10: Use of MinHash signatures and fuzzy extraction for key generation**

327 A CUF outputs a set  $S$  of DNA sequences as a response to an input primer. If the function is evaluated  
328 again with the same input primer, it outputs a set of DNA sequences that is similar to the previously  
329 generated set  $S$ , and if the function is evaluated again with a different input primer, it outputs a set that  
330 is different from  $S$ . In order to map a response sequence set  $S$  to an output of bits (or bytes), we use a  
331 MinHash signature<sup>4, 5</sup> followed by a fuzzy vault system<sup>6</sup>, which is a variant of a fuzzy extractor<sup>7</sup>.

332 MinHash-based tools are widely used, with numerous applications in genomics, such as taxonomic  
333 diversity assessment<sup>8</sup> and metagenome distance estimation<sup>9</sup>. A MinHash maps a set – in this case the  
334  $k$ -mers and associated abundances that comprise a response of a CUF – to a signature in form of a  
335 vector. The vector dimensions are pre-defined and constant, irrespective of the set size, and the  
336 similarity of two compared vectors approximately matches the Jaccard similarity of the respective  $k$ -  
337 mer sets, from which the signatures were derived.

338 Specifically, our MinHash function uses a weighted MinHash implementation (datasketch Python  
339 library) with the relative abundances of  $k$ -mers as weights. This, together with the same selection of  $k$ -  
340 mer size and threshold, most accurately represents the analysis based on weighted Jaccard similarity  
341 of Supplementary Note 7. Each result of the 255 MinHash permutations is converted to one byte by  
342 modulo 256, yielding a signature of 255 bytes.

343 The vectors are then converted to binary keys by the fuzzy vault. This works as follows: Let  $w$  be the  
344 data from a noisy process - in our setup  $w$  is generated from the MinHash signatures obtained from  
345 the CUF. A fuzzy vault system generates a random key  $c$ , and uses it to generate the helper data  $h$   
346 from the data  $w$ . The helper data is publicly stored and provides redundancy for error correction but  
347 does not give any advantage for reconstructing the original data  $w$  or the key  $c$  on its own. The original  
348 data  $w$  is not stored, instead the generated random key  $c$  is used for authentication. If new data  $w'$  is  
349 collected the fuzzy vault system attempts to reconstruct the original key  $c$  from the new data  $w'$  and  
350 the original helper data  $h$ . If the new data  $w'$  is close (i.e., has a high similarity) to the original data  $w$ ,  
351 then the redundancy included in the helper data  $h$  suffices to recover the same key  $c$  from  $w'$ .

352 More specifically, based on experiments 1-39, we implemented a fuzzy vault system with a so-called  
353 code offset construction<sup>6</sup>. Given the original data  $w$ , we generate a 256-bit key  $c$  (i.e., 32 bytes) and  
354 encode it with a with a Reed-Solomon code (reedsolo Python library,  $255-32=223$  bytes of

355 redundancy), which yields a byte string  $c^*$  of equal length to the MinHash. We then store the helper  
356 information  $h = w - c^*$ , where subtraction is in the finite field the letters of the codeword are in (i.e.,  
357 bytes in our setup).

358 At the reconstruction phase, we are given the helper information  $h$  and data  $w'$ , and we compute

359 
$$c' = \text{decode}(w' - h) = \text{decode}(w' - w + c^*)$$

360 where `decode` is the Reed-Solomon decoder. We have that  $c' = c$  if the data  $w'$  is sufficiently close to  
361 the original data  $w$ , since then, the redundancy afforded by the Reed-Solomon code allows  
362 reconstruction of  $c = \text{decode}(w' - w + c^*)$ . Otherwise, reconstruction of  $c$  will fail, and no key is  
363 generated.

364 See the code supplement for an implementation of the fuzzy vault system, which correctly reconstructs  
365 all code words in the dataset stemming from experiments 1-39 (refer to Fig. 3g).

366 **Supplementary Note 11: Discussion of potential inverse operation and brute force attacks**

367 The response of a CUF to a challenge is the result of the random chemical composition of the orDNA  
368 pool. This is a sufficient condition for the CRPs unpredictability. However, for cryptographic security,  
369 irreversibility in analogy to a one-way function is needed. This means that a publicly stored output (and  
370 the helper data) should not reveal information that can be used to infer the corresponding input. By the  
371 CUF's materiality and random design, this is intrinsically the case. This is even further strengthened by  
372 the fact that the chemical response – i.e. the sequence reads – is masked by k-mer analysis,  
373 MinHashing and Fuzzy extraction, which are computationally infeasible to invert. So not only can the  
374 input not be inferred from the output, but it is with current means even infeasible to unambiguously  
375 infer the chemical response from the numerical output. This leads to a combination of digital and  
376 materially manifested security layers.

377 However, the possibility of brute force attacks is unavoidable for any one-way function, PUF, or CUF.  
378 For our CUF, the most straightforward way to prevent successful guessing of CRPs is to make the  
379 pool so large that trial and error to find a given CRP is infeasible within reasonable time and cost.  
380 Already at the currently used size of  $2.6 \cdot 10^{10}$  sequences, a successful attack to find a CRP by trial  
381 and error is unlikely, and CUFs even larger than the ones applied in this work would be conceivable.  
382 To read all CRPs with the previously calculated 10'000 reads and at a pool size of  $2.6 \cdot 10^{10}$   
383 sequences, one would need ca 260 trillion reads (the equivalent of reading roughly half a million  
384 human genomes at a depth of 30). Using state-of-the-art high-throughput sequencing such as the  
385 NovaSeq X platform by Illumina, the estimated cost would approach half a billion USD for sequencing  
386 alone, not accounting for PCR, time and labor, infrastructure, and other costs.

387 Additionally, this would require that an adversary malignantly gains physical access to the entire pool  
388 in large enough quantities and knows the orDNA's general design. In our practical implementation of  
389 the non-copiable CUF tokens, brute force attacks are therefore already prevented by the fact that only  
390 a limited number of operations can be performed on a given token.

391 **Supplementary Note 12: Discussion of 2',3'-dideoxy end modification to introduce**  
392 **unclonability**

393 As discussed in the main manuscript, a major constraint for re-creation of a chemical unclonable  
394 function is the massive number of sequences, resulting in exorbitant cost of reading and recreating the  
395 function. However, should an adversary gain physical access to a given CUF, using the outer handle  
396 such an adversary could not only sequence, but also copy the pool using PCR.

397 Unclonability in the sense of uncopiability is a therefore desirable additional feature in the application  
398 of a chemical random function. In order to switch an orDNA pool from the clonable (i.e. copiable) to the  
399 unclonable (i.e. uncopiable) state, the constant handles at either end of the sequences are removed  
400 via restriction digest. In the chosen implementation, only very short handles of 6 and 7 nucleotides,  
401 respectively, remain on both ends. These are too short to function as universal PCR primer binding  
402 regions due to their low melting temperature - the optimal  $T_m$  of primers being between 55 and 60 °C  
403 with a recommended length of 18-30 nucleotides<sup>10</sup>.

404 To prevent the re-addition of longer handles for PCR amplification, the sticky ends resulting from the  
405 restriction digest are subsequently blunted using 2',3'-dideoxy nucleotides. Such dideoxy nucleotides  
406 are used in Sanger sequencing<sup>11</sup> and their incorporation results in a 3' end without a free hydroxy  
407 group. This means no ligation can be performed, as the 3'-hydroxy group is necessary for the formation of  
408 a phosphodiester bond. The incorporation of dideoxy nucleotides is stable, i.e. cannot be efficiently  
409 removed.<sup>12</sup>

410 To demonstrate that ligation is no longer possible, a CUF comprising approx.  $10^8$  unique sequences  
411 treated with PstI and blunted with dideoxy nucleotides was sent to FASTERIS SA, an external service  
412 provider, where it underwent a standard ligation procedure for genomic library preparation. The  
413 selected ligation protocol is thus optimized for wide application and performs well in adding adapter  
414 sequences to diverse libraries. Two controls were treated along with the test sample, one consisting of  
415 the untreated orDNA library, the second one being digested and blunted, but using regular dNTPs  
416 instead of dideoxy analogs. The total amount of DNA provided to the service provider was approx. 200  
417 ng for all three samples, which is several orders of magnitude more than would be used for a PCR  
418 reaction.

419 The ligation results and quality control data are shown in Supplementary Fig. . S11. While both control  
420 libraries were successfully ligated with high yields, the dideoxy-treated CUF yielded no significant  
421 product amounts of the expected length, as evidenced by the gel and the electropherogram. This  
422 indicates that dideoxy blunting is indeed a suitable measure to make cloning of the function  
423 impossible, or at least extremely difficult. Any intruder who attempts to copy such a CUF would not  
424 only have to get physical access to an unrealistically high amount of the original function, but is likely  
425 to introduce bias and change the structure of the orDNA in a way that would be evident and impair its  
426 functionality.

427 The modification additionally introduces obstacles to simultaneous sequencing of the entire pool, as  
428 this typically involves library preparation by adding adapters, either by PCR or by ligation. This also  
429 includes “PCR-free” methods, such as nanopore sequencing. The truncated and modified 3'-ends  
430 would need to be circumvented, which, even if possible, would increase the complexity and cost of  
431 sequencing and copying further.

432 In conclusion, it can be shown that, aside from the necessity of gaining access to the pool with  
433 malicious intent, there is no straightforward way to read and copy the pool. Any such attempt would  
434 increase the effort, cost and complexity, and introduce the risk of altering the pool in a way that  
435 hampers its performance as a random function.

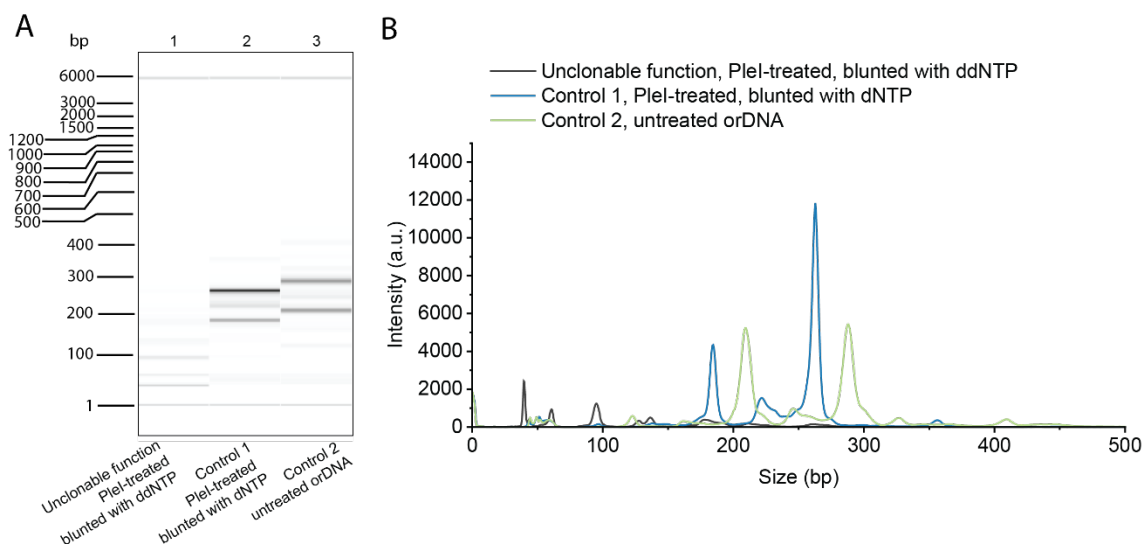

436

### 437 **Supplementary Fig. 12: Ligation results**

438 A) gel image and B) electropherogram, as received from FASTERIS SA. The expected length of the  
439 fully ligated fragments is 263 bp for samples 1 and 2, and 289 bp for sample 3. The fragments around  
30

440 185 and 210 bp correspond to the one-ended ligation. The labels were added to the gel image by the  
441 authors. The electropherograms were plotted from the raw data provided by FASTERIS SA. Source  
442 data are provided as a Source Data file.

443

#### 444 **Supplementary Note 13: Cost estimation**

445 The cost of a CUF is composed of the cost for the function itself and of its operation. For this study,  
446 0.5 exabyte (4g of an orDNA library) were commercially ordered for a price of ca 90 USD. This  
447 corresponds to less than 20 cents per 1000 Terabyte of entropy in the form of operable random DNA.  
448 This amount of orDNA in theory suffices for billions of individual CUFs as implemented in this study,  
449 meaning the cost of random synthesis is insignificant in any realistic scenario at scale. However,  
450 generating a CUF from orDNA requires a PCR reaction to generate multiple copies, followed by  
451 chemical modifications to switch the function from the clonable to the unclonable state. Within the  
452 scales applied in this study, the costs for these steps approximately follow a linear relationship with  
453 regards to the function size. For a CUF comprising  $10^8$  unique sequences, the singleplex qPCR using  
454 an intercalating dye in 20  $\mu$ l reaction volume with standard primers costs ca 50 cents in reagents and  
455 consumables at scale. The material generated by a single PCR reaction was on average sufficient for  
456 ca. 200 executions of the CUF, but this is scalable.

457 The restriction digest with P1el costs ca 1 USD/assay in reagents and consumables, again for the  
458 amount needed for 200 executions of the function. End blunting with ddNTPs costs ca. 3 USD;  
459 although this calculation takes a prudent approach with the ddNTPs and enzyme added in large  
460 excess. It is therefore likely that further process optimization would cut the cost significantly.

461 Adding up all cost items for function generation – from DNA synthesis to generating the double-  
462 stranded orDNA to switching it to the unclonable state – results in a price of around 4.6 USD per CUF.

463 At least two executions are performed per input (one for registration, one or more for authentication  
464 events). For a single function execution, 4 consecutive PCR reactions, including adding the  
465 sequencing adapters, are performed, followed by Illumina sequencing. The cost for one operation from  
466 input to output is comprised of reagents and consumables for PCR and next generation sequencing  
467 (see Supplementary Table 1). For the sequencing cost, it was assumed that 10'000 reads are needed  
468 for a single execution, which is a prudent estimate based on the down-sampling experiments  
469 assuming no input constraints (as discussed in Supplementary Note 9). The current price of an iSeq  
470 100 reagent kit was taken as a benchmark and broken down to the defined number of required reads.

471 In summary, the cost of generating the function lies below 1% and is thus insignificant. The combined  
472 cost is instead dominated by the price for sequencing and PCR reagents, which currently make up



473 80% of the entire amount per function execution. It is important to note that the assumptions  
474 underlying the sequencing cost estimate are deliberately conservative and based on the current  
475 procedure; when reducing the required reads to 1000 and assuming the use of a large-scale  
476 sequencing platform, the sequencing costs would drop by approx. two orders of magnitude. In that  
477 case, the costs for PCR reagents and consumables would dominate the overall price at approx. 2  
478 USD.

479 A caveat of the above calculations is that most of the items do not involve labor, as this is hard to  
480 estimate in the setting of a research laboratory. Moreover, an assessment of the current labor  
481 requirement would not be a realistic benchmark, as most of the operations are of low complexity and  
482 would be automatized in a large-scale setting. The remaining hands-on work can easily be parallelized  
483 in large multi-well plates, processing many function operations at the same time. Thus, at scale, labor  
484 is not expected to have a large impact on the overall cost.

485

486 **Supplementary Table 1**487 Approximated item-by-item cost compilation for generation of a function comprising ca 10<sup>8</sup> sequences.

| <b>Step</b>      | <b>Cost item</b>                                                  | <b>Approximated cost at scale (USD)</b> | <b>Cost per execution*</b> |
|------------------|-------------------------------------------------------------------|-----------------------------------------|----------------------------|
| Synthesis        | Library                                                           | <0.01                                   | <0.0001                    |
| orDNA generation | Mastermix (e.g. KAPA SYBR FAST, KAPA Biosystems, Wilmington, USA) | 0.35                                    | <0.01                      |
|                  | PCR primers                                                       | <0.01                                   | <0.0001                    |
|                  | Consumables                                                       | 0.15                                    | 0.0015                     |
|                  | Other reagents                                                    | 0.10                                    | 0.001                      |
|                  | Restriction enzyme                                                | 0.80                                    | 0.008                      |
| End modification | Consumables                                                       | 0.20                                    | 0.002                      |
|                  | Sequenase (e.g. ThermoFisher)                                     | 1.30                                    | 0.0013                     |
|                  | ddNTP mix                                                         | 1.80                                    | 0.0018                     |
|                  | Other reagents                                                    | 0.10                                    | 0.001                      |
|                  | <b>Total</b>                                                      |                                         | <b>4.80</b>                |

488 \*calculated based on the assumption of 200 executions per function

489

490 **Supplementary Table 2**

491 Approximated item-by-item cost compilation for a single execution of a function comprising ca 10<sup>8</sup>  
 492 sequences.

| <b>Step</b>               | <b>Cost item</b>                                                  | <b>Approximated cost per function execution</b> |
|---------------------------|-------------------------------------------------------------------|-------------------------------------------------|
| <b>Function operation</b> | Mastermix (e.g. KAPA SYBR FAST, KAPA Biosystems, Wilmington, USA) | 1.40                                            |
|                           | PCR primers                                                       | 0.05                                            |
|                           | Consumables                                                       | 0.60                                            |
|                           | Illumina sequencing (iSeq 100 reagent kit)                        | 1.50                                            |
|                           | Other reagents                                                    | 0.10                                            |
| <b>Total</b>              |                                                                   | <b>3.65</b>                                     |

493

494

495 **Supplementary Table 3: Sequence and primer list**

| Name                       | Sequence 5'-3'                                                                                       |
|----------------------------|------------------------------------------------------------------------------------------------------|
| Library 1                  | ATGCGATGCAGTAAGCACTC<br>NNNNNNNNNNNNNNNNNNNNNGCTCAGGATACCAAGCTGTCCNNNNNNNN<br>NNGATATCTGCTCGGACCGCTA |
| Library 2                  | ATGCGAGTCAGATNGCACTC<br>NNNNNNNNNNNNNNNNNNNNNGCTCAGGATACCAAGCTGTCCNNNNNNNN<br>NNGACATNGGACGACTCAGCTA |
| Library 1 Handle primer fw | ATGCGATGCAGTAAGCACTC                                                                                 |
| Library 1 Handle primer rv | TAGCGGTCCGAGCAGATATC                                                                                 |
| Library 2 Handle primer fw | ATGCGAGTCAGATNGCACTC                                                                                 |
| Library 2 Handle primer rv | TAGCTGAGTCGTCCNATGTC                                                                                 |
| Input primer infw1         | AGT AAG CAC TCG CTT ACG AC                                                                           |
| Input primer invr1         | GAG CAG ATA TCA TTG GCA ACG                                                                          |
| Input primer infw4         | TGCAGTAAGCACTCTACGAC                                                                                 |
| Input primer invr5         | TCCGAGCAGATATCGGCAACG                                                                                |
| Input primer infw4.1       | TGCAGTAAGCACTCTACGAT                                                                                 |
| Input primer invr5.2       | TCCGAGCAGATATCAGCAACG                                                                                |
| Input primer infw4.3       | TGCAGTAAGCACTCAGGTCG                                                                                 |
| Input primer invr5.3       | TCCGAGCAGATATCATTCTTC                                                                                |
| Input primer infw4.4       | TGC AGT AAG CAC TCT TTT TT                                                                           |
| Input primer invr5.4       | TCC GAG CAG ATA TCT TTT TTT                                                                          |
| Input primer infw5         | GCAGTAAGCACTCTTACGAC                                                                                 |
| Input primer invr6         | CCGAGCAGATATCTGGCAACG                                                                                |
| Input primer infw6         | CAGTAAGCACTCGTTACGAC                                                                                 |

|                           |                                                             |
|---------------------------|-------------------------------------------------------------|
| Input primer inv7         | CGAGCAGATATCTTGGCAACG                                       |
| Input primer inv8         | GTCCGAGCAGATATCGCAACG                                       |
| Input primer infw9        | ATGCAGTAAGCACTCTACGA                                        |
| Input primer inv9         | ATGCAGTAAGCACTCTACGA                                        |
| Trimming primer fw        | ACACGACGCTCTTCCGATCT                                        |
| Trimming primer rv        | GGACAGCTTGGTATCCTGAGC                                       |
| Illumina primer 1F        | ACACTCTTTCCCTACACGACGCTCTTCCGATCT                           |
| Illumina primer 1R-<br>AL | GTGACTGGAGTTCAGACGTGTGCTCTTCCGATCTGGACAGCTTGGTATCCT<br>GAGC |
| Illumina primer 2FU       | AATGATACGGCGACCACCGAGATCTACACTCTTCCCTACACGACGC              |
| Illumina primer 2RI       | CAAGCAGAAGACGGCATAACGAGATCGTGATGTGACTGGAGTTCAGACGTG         |
| Index 1                   | T                                                           |
| Illumina primer 2RI       | CAAGCAGAAGACGGCATAACGAGATACATCGGTGACTGGAGTTCAGACGTG         |
| Index 2                   | T                                                           |
| Illumina primer 2RI       | CAAGCAGAAGACGGCATAACGAGATGCCTAAGTGACTGGAGTTCAGACGTG         |
| Index 3                   | T                                                           |
| Illumina primer 2RI       | CAAGCAGAAGACGGCATAACGAGATTGGTCAGTGACTGGAGTTCAGACGTG         |
| Index 4                   | T                                                           |
| Illumina primer 2RI       | CAAGCAGAAGACGGCATAACGAGATCACTGTGTGACTGGAGTTCAGACGTG         |
| Index 5                   | T                                                           |
| Illumina primer 2RI       | CAAGCAGAAGACGGCATAACGAGATATTGGCGTGACTGGAGTTCAGACGTG         |
| Index 6                   | T                                                           |
| Illumina primer 2RI       | CAAGCAGAAGACGGCATAACGAGATGATCTGGTGACTGGAGTTCAGACGTG         |
| Index 7                   | T                                                           |
| Illumina primer 2RI       | CAAGCAGAAGACGGCATAACGAGATTCAAGTGACTGGAGTTCAGACGTG           |
| Index 8                   | T                                                           |
| Illumina primer 2RI       | CAAGCAGAAGACGGCATAACGAGATCTGATCGTGACTGGAGTTCAGACGTG         |
| Index 9                   | T                                                           |
| Illumina primer 2RI       | CAAGCAGAAGACGGCATAACGAGATAAGCTAGTGACTGGAGTTCAGACGTG         |
| Index 10                  | T                                                           |

|                                 |                                                          |
|---------------------------------|----------------------------------------------------------|
| Illumina primer 2RI<br>Index 11 | CAAGCAGAAGACGGCATAACGAGATGTAGCCGTGACTGGAGTTCAGACGTG<br>T |
| Illumina primer 2RI<br>Index 12 | CAAGCAGAAGACGGCATAACGAGATTACAAGGTGACTGGAGTTCAGACGTG<br>T |
| Illumina primer 2RI<br>Index 13 | CAAGCAGAAGACGGCATAACGAGATTTGACTGTGACTGGAGTTCAGACGTG<br>T |
| Illumina primer 2RI<br>Index 14 | CAAGCAGAAGACGGCATAACGAGATGGAAGTGTGACTGGAGTTCAGACGTG<br>T |
| Illumina primer 2RI<br>Index 15 | CAAGCAGAAGACGGCATAACGAGATTGACATGTGACTGGAGTTCAGACGTG<br>T |
| Illumina primer 2RI<br>Index 16 | CAAGCAGAAGACGGCATAACGAGATGGACGGGTGACTGGAGTTCAGACGT<br>GT |
| Illumina primer 2RI<br>Index 17 | CAAGCAGAAGACGGCATAACGAGATCTCTACGTGACTGGAGTTCAGACGTG<br>T |

496

497 **Supplementary Table 4: List of experiments**

| <b>Experiment number</b> | <b>Experiment designation</b> | <b>CUF description</b>                              | <b>Input primers</b> | <b>Input bases</b> | <b>Sequencing file name</b>                 |
|--------------------------|-------------------------------|-----------------------------------------------------|----------------------|--------------------|---------------------------------------------|
| 1                        | 1                             | CUF S1, 10 <sup>8</sup> sequences                   | infw4/inrv5          | TACGAC / GGCAACG   | Sp1-Infw4-Inrv5-1_S5_L001_R1_001.fastq      |
| 2                        | 2                             | CUF S1, 10 <sup>8</sup> sequences                   | infw4/inrv5          | TACGAC/ GGCAACG    | Sp1-Infw4-Inrv5-2_S6_L001_R1_001.fastq      |
| 3                        | 3                             | CUF S1, 10 <sup>8</sup> sequences                   | infw4/inrv5          | TACGAC/ GGCAACG    | Infw4-Inrv5-1_S1_L001_R1_001.fastq          |
| 4                        | 4                             | CUF S1, 10 <sup>8</sup> sequences                   | infw4/inrv5          | TACGAC/ GGCAACG    | Infw4-Inrv5-2_S2_L001_R1_001.fastq          |
| 5                        | P1.1                          | CUF S1 , Proliferation 1, 10 <sup>8</sup> sequences | infw4/inrv5          | TACGAC/ GGCAACG    | Sp1-amp-Infw4-Inrv5-1_S11_L001_R1_001.fastq |
| 6                        | P1.2                          | CUF S1 , Proliferation 1, 10 <sup>8</sup> sequences | infw4/inrv5          | TACGAC/ GGCAACG    | Sp1-amp-Infw4-Inrv5-2_S12_L001_R1_001.fastq |
| 7                        | P2                            | CUF S1 , Proliferation 2, 10 <sup>8</sup> sequences | infw4/inrv5          | TACGAC/ GGCAACG    | 0_S1_L001_R1_001.fastq                      |
| 8                        | P3                            | CUF S1 , Proliferation 3, 10 <sup>8</sup> sequences | infw4/inrv5          | TACGAC/ GGCAACG    | 1_S2_L001_R1_001.fastq                      |
| 9                        | P4                            | CUF S1 , Proliferation 4, 10 <sup>8</sup> sequences | infw4/inrv5          | TACGAC/ GGCAACG    | 2_S3_L001_R1_001.fastq                      |

|    |    |                                                           |                     |                    |                                                             |
|----|----|-----------------------------------------------------------|---------------------|--------------------|-------------------------------------------------------------|
| 10 | P5 | CUF S1 ,<br>Proliferation 5,<br>10 <sup>8</sup> sequences | infw4/inrv5         | TACGAC/<br>GGCAACG | 3_S4_L001_R1_001.fastq                                      |
| 11 | 5  | CUF S1, 10 <sup>8</sup><br>sequences                      | infw4.1/inrv5       | TACGAT/<br>GGCAACG | Sp1-Infw4-1-Inrv5-<br>1_S9_L001_R1_001.fastq                |
| 12 | 6  | CUF S1, 10 <sup>8</sup><br>sequences                      | infw4.1/inrv5       | TACGAT/<br>GGCAACG | Sp1-Infw4-1-Inrv5-<br>2_S10_L001_R1_001.fastq               |
| 13 | 7  | CUF S1, 10 <sup>8</sup><br>sequences                      | infw4/inrv5.2       | TACGAC/<br>AGCAACG | Sp1-Infw4-Inrv5-2-<br>1_S11_L001_R1_001.fastq               |
| 14 | 8  | CUF S1, 10 <sup>8</sup><br>sequences                      | infw4/inrv5.2       | TACGAC/<br>AGCAACG | Sp1-Infw4-Inrv5-2-<br>2_S12_L001_R1_001.fastq               |
| 15 | 9  | CUF S1, 10 <sup>8</sup><br>sequences                      | infw4.3/inrv5.<br>3 | AGGTCG/<br>AATCATG | Sp1-Infw4-3-Inrv5-3-<br>2_S14_L001_R1_001.fastq             |
| 16 | 10 | CUF S1, 10 <sup>8</sup><br>sequences                      | infw4.3/inrv5.<br>3 | AGGTCG/<br>AATCATG | Sp1-Infw4-3-Inrv5-3-<br>2_S14_L001_R1_001.fastq             |
| 17 | 11 | CUF S1, 10 <sup>8</sup><br>sequences                      | infw4.4/inrv5.<br>4 | TTTTTT/<br>TTTTTTT | Lib4-Sp1-G2-infw4-4-inrv5-<br>4-<br>1_S13_L001_R1_001.fastq |
| 18 | 12 | CUF S1, 10 <sup>8</sup><br>sequences                      | infw4.4/inrv5.<br>4 | TTTTTT/<br>TTTTTTT | Lib4-Sp1-G2-infw4-4-inrv5-<br>4-<br>2_S14_L001_R1_001.fastq |
| 19 | 13 | CUF S1, 10 <sup>8</sup><br>sequences                      | infw4/inrv8         | TACGAC/<br>GCAACG  | Sp1-Infw4-Inrv8-<br>1_S9_L001_R1_001.fastq                  |
| 20 | 14 | CUF S1, 10 <sup>8</sup><br>sequences                      | infw4/inrv8         | TACGAC /<br>GCAACG | Sp1-Infw4-Inrv8-<br>2_S10_L001_R1_001.fastq                 |
| 21 | 15 | CUF S1, 10 <sup>8</sup><br>sequences                      | infw9/inrv9         | TACGA /<br>GGCAAC  | 8_S9_L001_R1_001.fastq                                      |
| 22 | 16 | CUF S1, 10 <sup>8</sup><br>sequences                      | infw9/inrv9         | TACGA /<br>GGCAAC  | 9_S10_L001_R1_001.fastq                                     |



|    |    |                                            |             |                                  |                                              |
|----|----|--------------------------------------------|-------------|----------------------------------|----------------------------------------------|
| 23 | 17 | CUF S1, 10 <sup>8</sup><br>sequences       | infw1/inrv1 | GCTTACGAC<br>/<br>ATTGGCAAC<br>G | Infw1-Inrv1-<br>2_S3_L001_R1_001.fastq       |
| 24 | 18 | CUF S1, 10 <sup>8</sup><br>sequences       | infw1/inrv1 | GCTTACGAC<br>/<br>ATTGGCAAC<br>G | Sp1-Infw1-Inrv1-<br>1_S7_L001_R1_001.fastq   |
| 25 | 19 | CUF S1, 10 <sup>8</sup><br>sequences       | infw1/inrv1 | GCTTACGAC<br>/<br>ATTGGCAAC<br>G | Sp1-Infw1-Inrv1-<br>2_S8_L001_R1_001.fastq   |
| 26 | 20 | CUF S2, 10 <sup>8</sup><br>sequences       | infw4/inrv5 | TACGAC /<br>GGCAACG              | Sp2-Infw4-Inrv5-<br>1_S1_L001_R1_001.fastq   |
| 27 | 21 | CUF S2, 10 <sup>8</sup><br>sequences       | infw4/inrv5 | TACGAC /<br>GGCAACG              | Sp2-Infw4-Inrv5-<br>2_S2_L001_R1_001.fastq   |
| 28 | 22 | CUF S2, 10 <sup>8</sup><br>sequences       | infw1/inrv1 | GCTTACGAC<br>/<br>ATTGGCAAC<br>G | Sp2-Infw1-Inrv1-<br>1_S3_L001_R1_001.fastq   |
| 29 | 23 | CUF S2, 10 <sup>8</sup><br>sequences       | infw1/inrv1 | GCTTACGAC<br>/<br>ATTGGCAAC<br>G | Sp2-Infw1-Inrv1-<br>2_S4_L001_R1_001.fastq   |
| 30 | 24 | CUF S3, 10 <sup>8</sup><br>sequences       | infw4/inrv5 | TACGAC /<br>GGCAACG              | Sp3-Infw4-Inrv5-<br>1_S3_L001_R1_001.fastq   |
| 31 | 25 | CUF S3, 10 <sup>8</sup><br>sequences       | infw4/inrv5 | TACGAC /<br>GGCAACG              | Sp3-Infw4-Inrv5-<br>2_S4_L001_R1_001.fastq   |
| 32 | 26 | CUF M1, 1.6 x<br>10 <sup>9</sup> sequences | infw5/inrv6 | TTACGAC /<br>TGCAACG             | Sp-e9-Inrv5-Inrv6-<br>1_S5_L001_R1_001.fastq |

|    |           |                                                           |               |                         |                                                |
|----|-----------|-----------------------------------------------------------|---------------|-------------------------|------------------------------------------------|
| 33 | 27        | CUF M1, 1.6 x<br>10 <sup>9</sup> sequences                | infw5/inrv6   | TTACGAC /<br>TGGCAACG   | Sp-e9-Inrv5-Inrv6-<br>2_S6_L001_R1_001.fastq   |
| 34 | 28        | CUF M1, 1.6 x<br>10 <sup>9</sup> sequences                | infw5/inrv5   | TTACGAC /<br>GGCAACG    | Sp-e9-Inrv5-Inrv5-<br>1_S7_L001_R1_001.fastq   |
| 35 | 29        | CUF M1, 1.6 x<br>10 <sup>9</sup> sequences                | infw5/inrv5   | TTACGAC /<br>GGCAACG    | Sp-e9-Inrv5-Inrv5-<br>2_S8_L001_R1_001.fastq   |
| 36 | 30        | CUF L1, 2.6 x<br>10 <sup>10</sup><br>sequences            | infw6/inrv7   | GTTACGAC /<br>TTGGCAACG | Sp-e10-Infw6-Inrv7-<br>1_S15_L001_R1_001.fastq |
| 37 | 31        | CUF L1, 2.6 x<br>10 <sup>10</sup><br>sequences            | infw6/inrv7   | GTTACGAC /<br>TTGGCAACG | Sp-e10-Infw6-Inrv7-<br>2_S16_L001_R1_001.fastq |
| 38 | 32        | CUF L1, 2.6 x<br>10 <sup>10</sup><br>sequences            | infw6/inrv6   | GTTACGAC /<br>TGGCAACG  | Sp-e10-Infw6-Inrv6-<br>1_S13_L001_R1_001.fastq |
| 39 | 33        | CUF L1, 2.6 x<br>10 <sup>10</sup><br>sequences            | infw6/inrv6   | GTTACGAC /<br>TGGCAACG  | Sp-e10-Infw6-Inrv6-<br>2_S14_L001_R1_001.fastq |
| 40 | C2<br>P1* | CUF S1 ,<br>Proliferation 1,<br>10 <sup>8</sup> sequences | infw4.1/inrv5 | TACGAT/<br>GGCAACG      | P1-infw4-<br>1inrv5_S4_L001_R1_001.fastq       |
| 41 | C2<br>P2* | CUF S1 ,<br>Proliferation 2,<br>10 <sup>8</sup> sequences | infw4.1/inrv5 | TACGAT/<br>GGCAACG      | P1-infw4-<br>1inrv5_S5_L001_R1_001.fastq       |
| 42 | C2<br>P3* | CUF S1 ,<br>Proliferation 3,<br>10 <sup>8</sup> sequences | infw4.1/inrv5 | TACGAT/<br>GGCAACG      | P1-infw4-<br>1inrv5_S6_L001_R1_001.fastq       |
| 43 | C2<br>P4* | CUF S1 ,<br>Proliferation 4,<br>10 <sup>8</sup> sequences | infw4.1/inrv5 | TACGAT/<br>GGCAACG      | P1-infw4-<br>1inrv5_S7_L001_R1_001.fastq       |

|    |           |                                                           |                     |                    |                                             |
|----|-----------|-----------------------------------------------------------|---------------------|--------------------|---------------------------------------------|
| 44 | C2<br>P5* | CUF S1 ,<br>Proliferation 5,<br>10 <sup>8</sup> sequences | infw4.1/inrv5       | TACGAT/<br>GGCAACG | P1-infw4-<br>1inrv5_S8_L001_R1_001.fastq    |
| 45 | C4<br>P1* | CUF S1 ,<br>Proliferation 1,<br>10 <sup>8</sup> sequences | infw4.3/inrv5.<br>3 | AGGTCG/<br>AATCATG | P1-infw4-3inrv5-<br>3_S14_L001_R1_001.fastq |
| 46 | C4<br>P2* | CUF S1 ,<br>Proliferation 2,<br>10 <sup>8</sup> sequences | infw4.3/inrv5.<br>3 | AGGTCG/<br>AATCATG | P1-infw4-3inrv5-<br>3_S15_L001_R1_001.fastq |
| 47 | C4<br>P3* | CUF S1 ,<br>Proliferation 3,<br>10 <sup>8</sup> sequences | infw4.3/inrv5.<br>3 | AGGTCG/<br>AATCATG | P1-infw4-3inrv5-<br>3_S16_L001_R1_001.fastq |
| 48 | C4<br>P4* | CUF S1 ,<br>Proliferation 4,<br>10 <sup>8</sup> sequences | infw4.3/inrv5.<br>3 | AGGTCG/<br>AATCATG | P1-infw4-3inrv5-<br>3_S17_L001_R1_001.fastq |
| 49 | C4<br>P5* | CUF S1 ,<br>Proliferation 5,<br>10 <sup>8</sup> sequences | infw4.3/inrv5.<br>3 | AGGTCG/<br>AATCATG | P1-infw4-3inrv5-<br>3_S18_L001_R1_001.fastq |
| 50 | C3<br>P1* | CUF S1 ,<br>Proliferation 1,<br>10 <sup>8</sup> sequences | infw4/inrv5.2       | TACGAC/<br>AGCAACG | P1-infw4inrv5-<br>2_S9_L001_R1_001.fastq    |
| 51 | C3<br>P2* | CUF S1 ,<br>Proliferation 2,<br>10 <sup>8</sup> sequences | infw4/inrv5.2       | TACGAC/<br>AGCAACG | P1-infw4inrv5-<br>2_S10_L001_R1_001.fastq   |
| 52 | C3<br>P3* | CUF S1 ,<br>Proliferation 3,<br>10 <sup>8</sup> sequences | infw4/inrv5.2       | TACGAC/<br>AGCAACG | P1-infw4inrv5-<br>2_S11_L001_R1_001.fastq   |
| 53 | C3<br>P4* | CUF S1 ,<br>Proliferation 4,<br>10 <sup>8</sup> sequences | infw4/inrv5.2       | TACGAC/<br>AGCAACG | P1-infw4inrv5-<br>2_S12_L001_R1_001.fastq   |

|    |           |                                                           |               |                    |                                           |
|----|-----------|-----------------------------------------------------------|---------------|--------------------|-------------------------------------------|
| 54 | C3<br>P5* | CUF S1 ,<br>Proliferation 5,<br>10 <sup>8</sup> sequences | infw4/inrv5.2 | TACGAC/<br>AGCAACG | P1-infw4inrv5-<br>2_S13_L001_R1_001.fastq |
|----|-----------|-----------------------------------------------------------|---------------|--------------------|-------------------------------------------|

498 Experiment designation corresponds to the nomenclature used in the main manuscript.

499 **Supplementary Table 5: List of Selection PCR parameters and results**

| Experiment number | Experiment designation | Input primers | Input bases          | Selection PCR cycles | Ct    | Annealing temp. (Ta) |
|-------------------|------------------------|---------------|----------------------|----------------------|-------|----------------------|
| 1                 | 1                      | infw4/inrv5   | TACGAC /<br>GGC AACG | 29                   | 17.54 | 62                   |
| 2                 | 2                      | infw4/inrv5   | TACGAC /<br>GGCAACG  | 29                   | 17.54 | 62                   |
| 3                 | 3                      | infw4/inrv5   | TACGAC /<br>GGCAACG  | 29                   | 17.43 | 62                   |
| 4                 | 4                      | infw4/inrv5   | TACGAC /<br>GGCAACG  | 29                   | 17.51 | 62                   |
| 5                 | P1.1                   | infw4/inrv5   | TACGAC /<br>GGCAACG  | 30                   | 14.4  | 62                   |
| 6                 | P1.2                   | infw4/inrv5   | TACGAC /<br>GGCAACG  | 30                   | 14.08 | 62                   |
| 7                 | P2                     | infw4/inrv5   | TACGAC /<br>GGCAACG  | 25                   | 16.25 | 62                   |
| 8                 | P3                     | infw4/inrv5   | TACGAC /<br>GGCAACG  | <b>25</b>            | 16.49 | 62                   |
| 9                 | P4                     | infw4/inrv5   | TACGAC /<br>GGCAACG  | 25                   | 16.68 | 62                   |
| 10                | P5                     | infw4/inrv5   | TACGAC /<br>GGCAACG  | 25                   | 15.72 | 62                   |
| 11                | 5                      | infw4.1/inrv5 | TACGAT /<br>GGCAACG  | 50                   | 21.12 | 62                   |
| 12                | 6                      | infw4.1/inrv5 | TACGAT /<br>GGCAACG  | 50                   | 21.89 | 62                   |
| 13                | 7                      | infw4/inrv5.2 | TACGAC /<br>AGCAACG  | 50                   | 20.04 | 62                   |

|    |    |                 |                           |    |       |    |
|----|----|-----------------|---------------------------|----|-------|----|
| 14 | 8  | infw4/inrv5.2   | TACGAC /<br>AGCAACG       | 50 | 19.78 | 62 |
| 15 | 9  | infw4.3/inrv5.3 | AGGTCG /<br>AATCATG       | 50 | 21.88 | 62 |
| 16 | 10 | infw4.3/inrv5.3 | AGGTCG /<br>AATCATG       | 50 | 20.86 | 62 |
| 17 | 11 | infw4.4/inrv5.4 | TTTTTT /<br>TTTTTTT       | 36 | 19.78 | 56 |
| 18 | 12 | infw4.4/inrv5.4 | TTTTTT /<br>TTTTTTT       | 36 | 19.65 | 56 |
| 19 | 13 | infw4/inrv8     | TACGAC /<br>GCAACG        | 25 | 15.5  | 62 |
| 20 | 14 | infw4/inrv8     | TACGAC /<br>GCAACG        | 25 | 15.59 | 62 |
| 21 | 15 | infw9/inrv9     | TACGA /<br>GGCAAC         | 24 | 11.9  | 62 |
| 22 | 16 | infw9/inrv9     | TACGA /<br>GGCAAC         | 24 | 12.13 | 62 |
| 23 | 17 | infw1/inrv1     | GCTTACGAC /<br>ATTGGCAACG | 45 | 39.43 | 62 |
| 24 | 18 | infw1/inrv1     | GCTTACGAC /<br>ATTGGCAACG | 50 | 41.4  | 62 |
| 25 | 19 | infw1/inrv1     | GCTTACGAC /<br>ATTGGCAACG | 50 | 39.71 | 62 |
| 26 | 20 | infw4/inrv5     | TACGAC /<br>GGCAACG       | 30 | 17.27 | 62 |
| 27 | 21 | infw4/inrv5     | TACGAC /<br>GGCAACG       | 30 | 17.2  | 62 |
| 28 | 22 | infw1/inrv1     | GCTTACGAC /<br>ATTGGCAACG | 50 | 35.71 | 62 |

|    |        |               |                           |    |       |    |
|----|--------|---------------|---------------------------|----|-------|----|
| 29 | 23     | infw1/inrv1   | GCTTACGAC /<br>ATTGGCAACG | 50 | 35.61 | 62 |
| 30 | 24     | infw4/inrv5   | TACGAC /<br>GGCAACG       | 25 | 16.31 | 62 |
| 31 | 25     | infw4/inrv5   | TACGAC /<br>GGCAACG       | 25 | 16.82 | 62 |
| 32 | 26     | infw5/inrv6   | TTACGAC /<br>TGGCAACG     | 25 | 17.23 | 62 |
| 33 | 27     | infw5/inrv6   | TTACGAC /<br>TGGCAACG     | 25 | 18.15 | 62 |
| 34 | 28     | infw5/inrv5   | TTACGAC /<br>GGCAACG      | 25 | 17.35 | 62 |
| 35 | 29     | infw5/inrv5   | TTACGAC /<br>GGCAACG      | 25 | 17.93 | 62 |
| 36 | 30     | infw6/inrv7   | GTTACGAC /<br>TTGGCAACG   | 25 | 19.9  | 62 |
| 37 | 31     | infw6/inrv7   | GTTACGAC /<br>TTGGCAACG   | 25 | 19.99 | 62 |
| 38 | 32     | infw6/inrv6   | GTTACGAC /<br>TGGCAACG    | 25 | 18.69 | 62 |
| 39 | 33     | infw6/inrv6   | GTTACGAC /<br>TGGCAACG    | 25 | 18.53 | 62 |
| 40 | C2 P1* | infw4.1/inrv5 | TACGAT/<br>GGCAACG        | 30 | 17.27 | 62 |
| 41 | C2 P2* | infw4.1/inrv5 | TACGAT/<br>GGCAACG        | 30 | 17.01 | 62 |
| 42 | C2 P3* | infw4.1/inrv5 | TACGAT/<br>GGCAACG        | 30 | 18.19 | 62 |

|    |        |                 |                    |    |       |    |
|----|--------|-----------------|--------------------|----|-------|----|
| 43 | C2 P4* | infw4.1/inrv5   | TACGAT/<br>GGCAACG | 30 | 18.12 | 62 |
| 44 | C2 P5* | infw4.1/inrv5   | TACGAT/<br>GGCAACG | 30 | 19.14 | 62 |
| 45 | C4 P1* | infw4.3/inrv5.3 | AGGTCG/<br>AATCATG | 30 | 19.65 | 62 |
| 46 | C4 P2* | infw4.3/inrv5.3 | AGGTCG/<br>AATCATG | 30 | 19.47 | 62 |
| 47 | C4 P3* | infw4.3/inrv5.3 | AGGTCG/<br>AATCATG | 30 | 19.97 | 62 |
| 48 | C4 P4* | infw4.3/inrv5.3 | AGGTCG/<br>AATCATG | 30 | 18.87 | 62 |
| 49 | C4 P5* | infw4.3/inrv5.3 | AGGTCG/<br>AATCATG | 30 | 19.47 | 62 |
| 50 | C3 P1* | infw4/inrv5.2   | TACGAC/<br>AGCAACG | 30 | 19.70 | 62 |
| 51 | C3 P2* | infw4/inrv5.2   | TACGAC/<br>AGCAACG | 30 | 20.32 | 62 |
| 52 | C3 P3* | infw4/inrv5.2   | TACGAC/<br>AGCAACG | 30 | 20.53 | 62 |
| 53 | C3 P4* | infw4/inrv5.2   | TACGAC/<br>AGCAACG | 30 | 20.72 | 62 |
| 54 | C3 P5* | infw4/inrv5.2   | TACGAC/<br>AGCAACG | 30 | 20.58 | 62 |

500

501



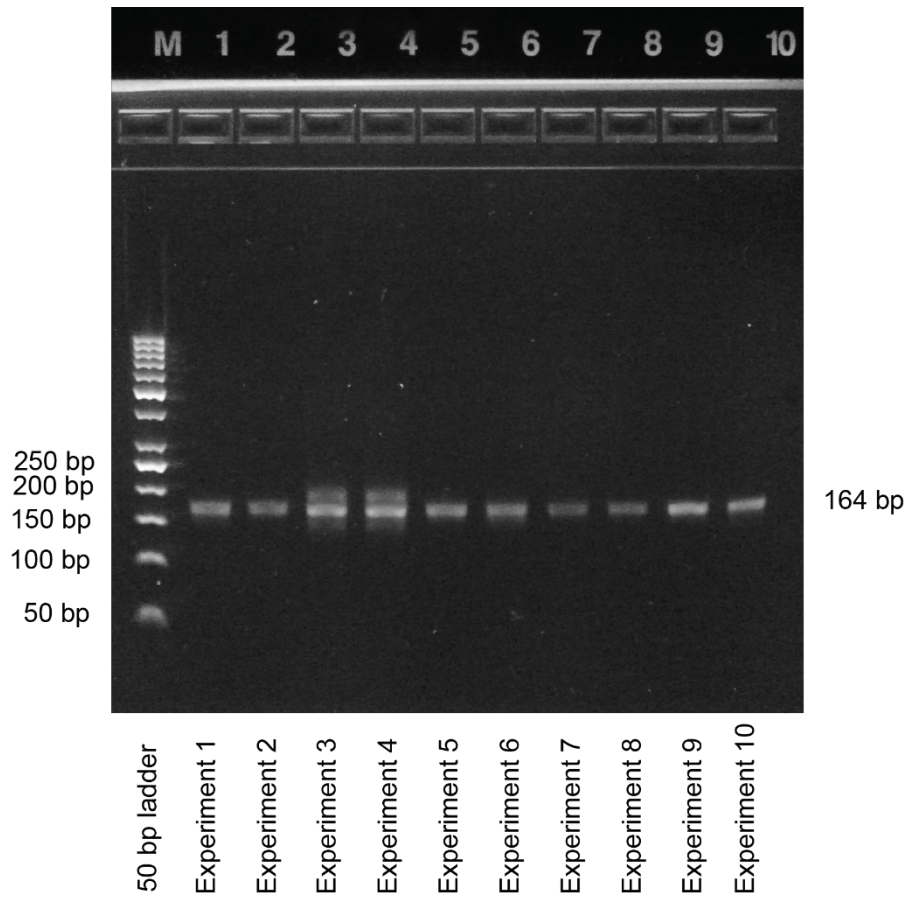

502

503 **Supplementary Fig. 13**

504 Agarose gel electrophoresis of experiments 1-10 (purified samples for sequencing). The image was  
505 converted to grayscale and adjusted for brightness and contrast.

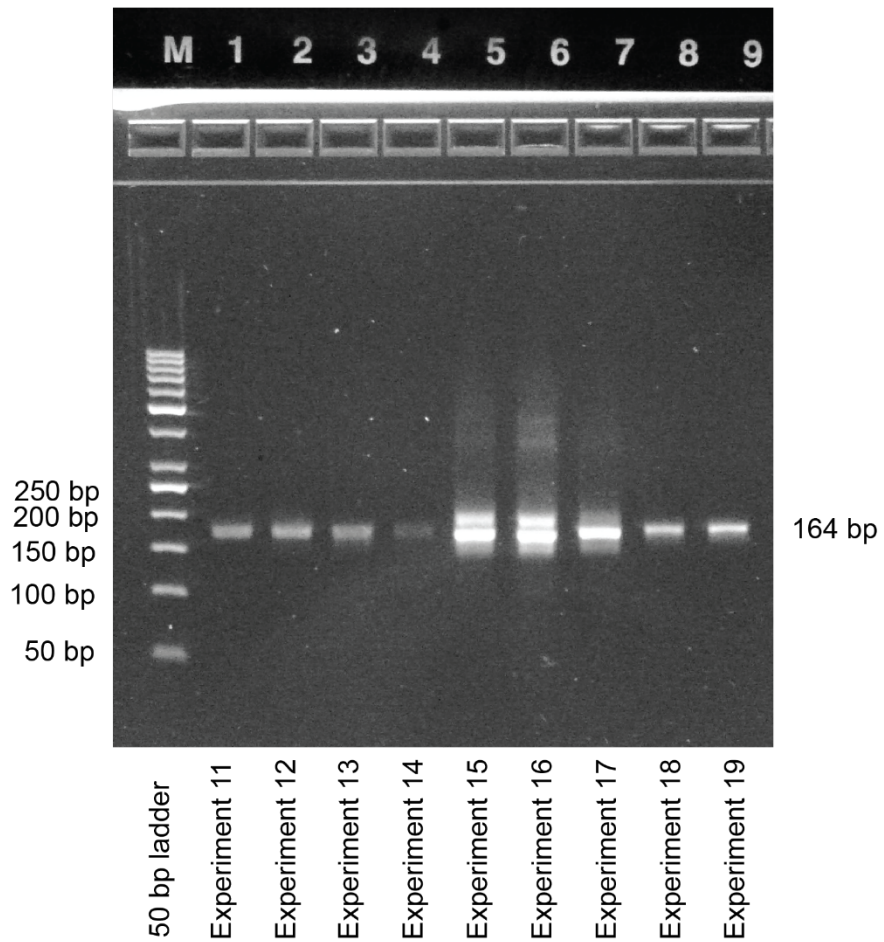

506

507 **Supplementary Fig. 14**

508 Agarose gel electrophoresis experiments 11-19 (purified samples for sequencing). The image was  
509 converted to grayscale and adjusted for brightness and contrast.

510

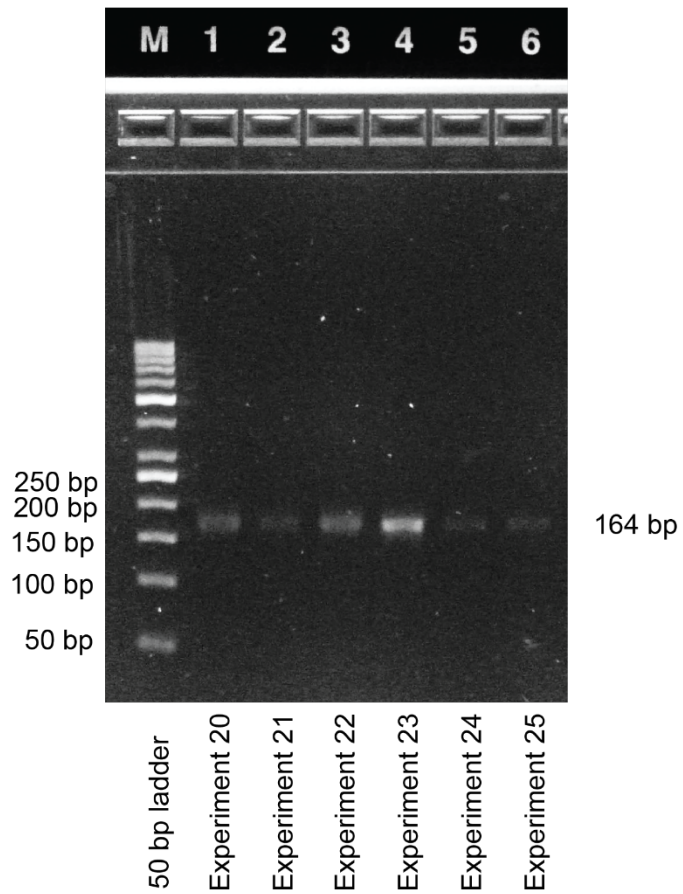

511

512 **Supplementary Fig. 15**

513 Agarose gel electrophoresis experiments 20-25 (purified samples for sequencing). The image was  
514 converted to grayscale and adjusted for brightness and contrast.

515

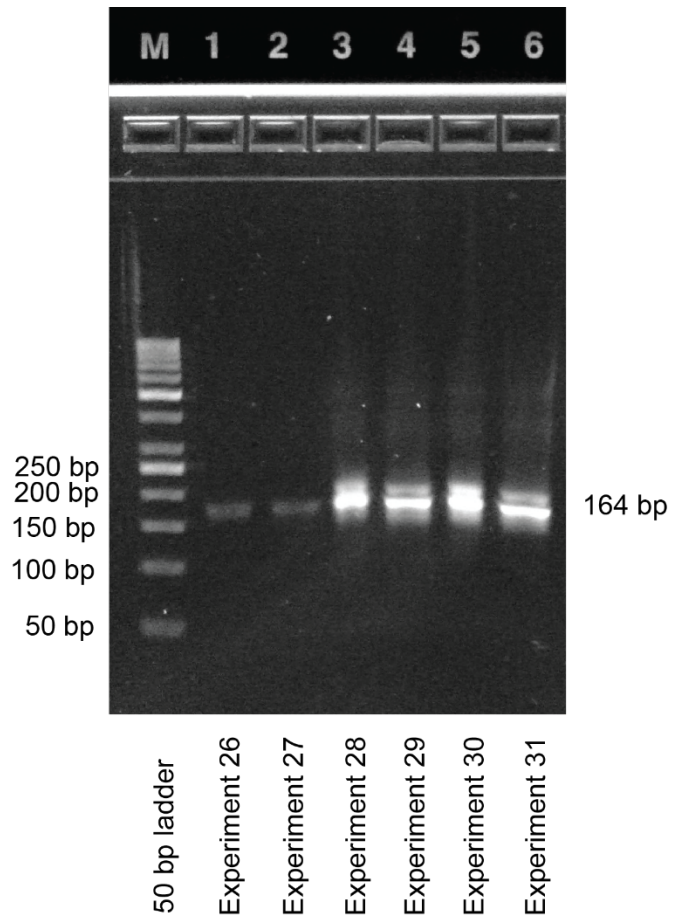

516

517 **Supplementary Fig. 16**

518 Agarose gel electrophoresis experiments 26-31 (purified samples for sequencing). The image was  
519 converted to grayscale and adjusted for brightness and contrast.

520

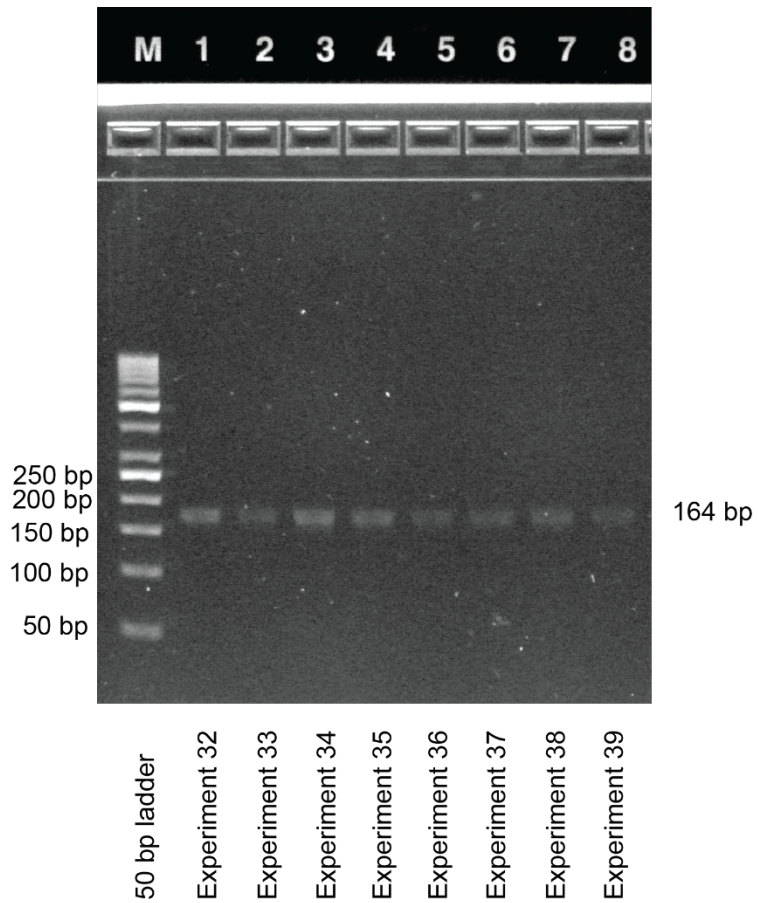

521

522 **Supplementary Fig. 4**

523 Agarose gel electrophoresis experiments 32-39 (purified samples for sequencing). The image was  
524 converted to grayscale and adjusted for brightness and contrast.

525

526 **References**

- 527 1. Meiser L. C., Koch J., Antkowiak P. L., Stark W. J., Heckel R. & Grass R. N. DNA synthesis for  
528 true random number generation. *Nat. Commun.* **11**, 1-9 (2020).
- 529  
530 2. Liu S. & Koslicki D. CMash: fast, multi-resolution estimation of k-mer-based Jaccard and  
531 containment indices. *Bioinformatics* **38**, i28-i35 (2022).
- 532  
533 3. Besta M., *et al.* Communication-efficient jaccard similarity for high-performance distributed  
534 genome comparisons. In: *2020 IEEE International Parallel and Distributed Processing  
535 Symposium (IPDPS)*. IEEE (2020).
- 536  
537 4. Broder A. Z. On the resemblance and containment of documents. In: *Proceedings.  
538 Compression and Complexity of SEQUENCES 1997 (Cat. No. 97TB100171)*. IEEE (1997).
- 539  
540 5. Haveliwala T. H., Gionis A. & Indyk P. Scalable Techniques for Clustering the Web (extended  
541 Abstract). In: *WebDB (informal proceedings)*. Citeseer (2000).
- 542  
543 6. Juels A. & Sudan M. A fuzzy vault scheme. *Designs, Codes and Cryptography* **38**, 237-257  
544 (2006).
- 545  
546 7. Dodis Y., Ostrovsky R., Reyzin L. & Smith A. Fuzzy Extractors: How to Generate Strong Keys  
547 from Biometrics and Other Noisy Data. *SIAM Journal on Computing* **38**, 97-139 (2008).
- 548  
549 8. Katz K. S., Shutov O., Lapoint R., Kimelman M., Brister J. R. & O'Sullivan C. STAT: a fast,  
550 scalable, MinHash-based k-mer tool to assess Sequence Read Archive next-generation  
551 sequence submissions. *Genome Biology* **22**, 1-15 (2021).
- 552  
553 9. Ondov B. D., *et al.* Mash: fast genome and metagenome distance estimation using MinHash.  
554 *Genome biology* **17**, 1-14 (2016).
- 555  
556 10. Apte A. & Daniel S. PCR primer design. *Cold Spring Harbor Protocols* **2009**, pdb. ip65 (2009).
- 557  
558 11. Sanger F., Nicklen S. & Coulson A. R. DNA sequencing with chain-terminating inhibitors. *PNAS*  
559 **74**, 5463-5467 (1977).
- 560  
561 12. Lim S. E. & Copeland W. C. Differential incorporation and removal of antiviral  
562 deoxynucleotides by human DNA polymerase  $\gamma$ . *Journal of Biological Chemistry* **276**, 23616-  
563 23623 (2001).

564

565
